# Supplementary material for: A lysosome-specific near-infrared fluorescent probe for in vitro cancer cell detection and non-invasive in vivo imaging
Source: Royal Society of Chemistry journal article supplement (doi:10.1039/c9cc07322a), 2019-01-01
Supplement: c9cc07322a1.pdf [file c9cc07322a1.pdf]

# Lysosome Specific Near-Infrared Fluorescent Probe for the *in vitro* Cancer Cell Detection and Non-Invasive *in vivo* Imaging

Rakesh Mengji,<sup>a,c</sup> Chiranjit Acharya,<sup>a</sup> Venugopal Vangala,<sup>a,c</sup> Avijit Jana<sup>\*a,b,c</sup>

<sup>a</sup>Department of Applied Biology, <sup>b</sup>Department of Organic Synthesis and Process Chemistry, CSIR-Indian Institute of Chemical Technology, Hyderabad 500007, <sup>c</sup>Academy of Scientific and Innovative Research (AcSIR), Ghaziabad 201002, India.

| S No | Contents                                                         | Page No |
|------|------------------------------------------------------------------|---------|
| 1    | <b>Materials and methods</b>                                     | 1-2     |
| 2    | <b>Preparation and Characterization</b>                          | 2-10    |
| 3    | <b>Photophysical properties of Probe 2</b>                       | 11      |
| 4    | <b>Cell Culture</b>                                              | 11      |
| 5    | <b>Cytotoxic studies using MTT assay</b>                         | 11-12   |
| 6    | <b>Cellular uptake study using confocal microscopy</b>           | 12-13   |
| 7    | <b>Intra cellular distribution of probe 2 in MCF 7 cell line</b> | 13-20   |
| 8    | <b>Intra cellular distribution of probe 2 in CHO cell line:</b>  | 21-26   |
| 9    | <b>Live Cell Imaging</b>                                         | 26-27   |
| 10   | <b>Cellular Uptake study with Flow Cytometry</b>                 | 27      |
| 11   | <b><i>In vivo</i> experiment</b>                                 | 27-29   |
| 12   | <b>pH dependent ratiometric cell imaging</b>                     | 29-31   |
| 13   | <b>Photostability of probe 2</b>                                 | 31-32   |
| 14   | <b>Particle size analysis</b>                                    | 33-40   |

## 1. Materials and methods:

All reagents were purchased from Sigma Aldrich and used without further purification. Acetonitrile and dichloromethane were distilled from CaH<sub>2</sub> before use. <sup>1</sup>H NMR spectra were recorded on a BRUKER- AV 400 and 500 MHz spectrometer. Chemical shifts are reported in ppm from tetramethylsilane with the solvent resonance as the internal standard (deuteriochloroform: 7.26 ppm). Data are reported as follows: chemical shifts, multiplicity (s = singlet, d = doublet, t = triplet, m = multiplet), coupling constant (Hz). <sup>13</sup>C NMR (175 MHz) spectra were recorded on a BRUKER-AV 500 MHz Spectrometer with complete proton decoupling. Chemical shifts are reported in ppm from tetramethylsilane with the

solvent resonance as the internal standard (deuteriochloroform: 77.0 ppm). UV/vis absorption spectra were recorded on an Agilent Cary 5000 UV-Vis-NIR UV/vis spectrophotometer, fluorescence emission spectra were recorded on the Agilent Cary Eclipse Fluorescence Spectrophotometer, FT-IR spectra were recorded on a Thermo Nicolet Nexus 670 FT-IR and HRMS spectra were recorded on a TOF MS ES+ mass spectrometer. Cytotoxicity were recorded on Synergy™ H1 is a configurable multi-mode microplate reader. Confocal images were recorded on Nikon Ti Eclipse confocal microscope. Chromatographic purification was done with 100-200 mesh silica gel (Merck). For reaction monitoring, precoated silica gel 60 F254 TLC sheets (Merck) were used. Cell culture media and all the other materials required for culturing were obtained from Gibco, USA

## 2. Preparation and Characterization.

The perylene monoimide dye N-(2,6-di-isopropyl)perylene-3,4- dicarboximide (**B**) was synthesized in one step following the literature procedure.<sup>1</sup> Then, the corresponding 9-Bromo compound (**1**) was prepared by the reaction of compound **B** with Br<sub>2</sub> in chlorobenzene at room temperature for 10 min. Subsequently 2-morpholinoethan-1-amine was installed on compound **1** to get the desired compound **2**. All the compound were cauterized by <sup>1</sup>H NMR, <sup>13</sup>C NMR and mass spectrometry.

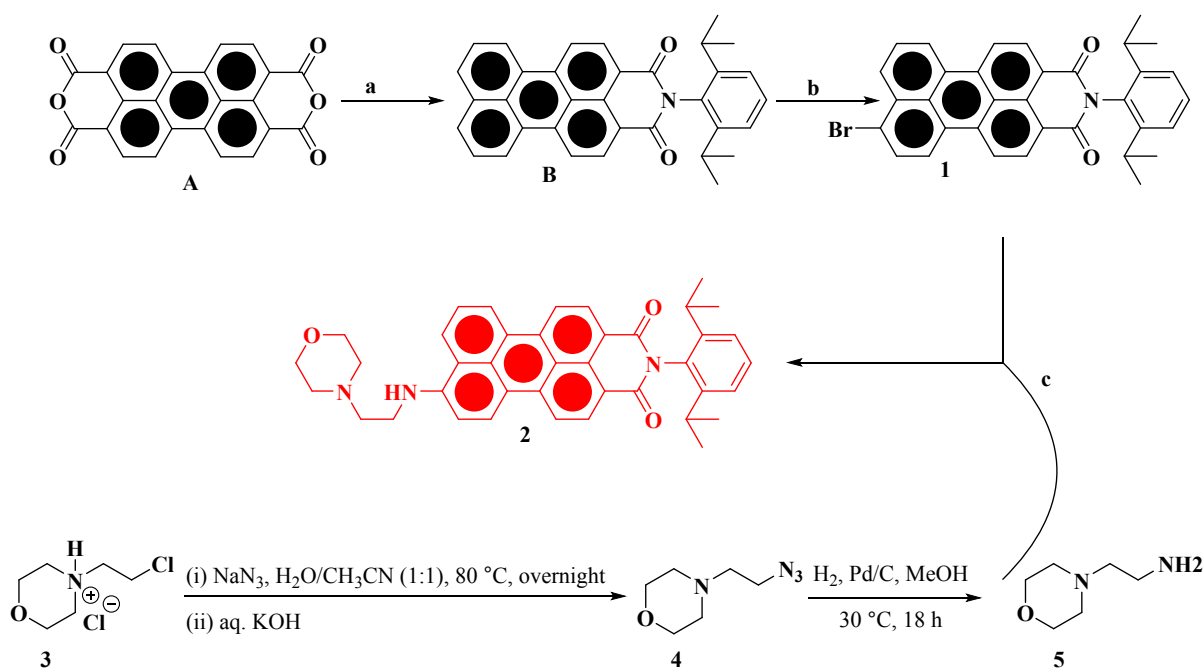

**Reagents and conditions:** (a) imidazole, 2,6-diisopropylaniline, Zn(OAc)<sub>2</sub>, 190 °C, 24h. (b) Br<sub>2</sub>, chlorobenzene, rt, 10 min, (c) 2-morpholinoethan-1-amine, NaO<sup>t</sup>Bu, Tris (dibenzylideneacetone) dipalladium(0), (2,2'-bis(diphenylphosphino)-1,1'-binaphthyl), toluene, reflux 12h.

### Scheme S1. Synthesis of the Probe 2

#### 2.1. Synthesis of 4-(2-azidoethyl)morpholine:

4-(2-chloroethyl)morpholine.HCl salt (500 mg, 2.7 mmol) was dissolved in H<sub>2</sub>O/CH<sub>3</sub>CN (1:1). Then NaN<sub>3</sub> (436 mg, 6.7 mmol) was added to it and the reaction mixture was refluxed for overnight at 80 °C. Then the reaction mixture was allowed to cool to room temperature and was basified with 2M KOH solution followed by extracted with diethyl ether. The organic layer was collected and dried over anhydrous Na<sub>2</sub>SO<sub>4</sub>. The solvent was evaporated to dryness to get yellow liquid (331 mg, 79 % of yield). <sup>1</sup>H NMR (500 MHz, CDCl<sub>3</sub>) δ = 3.74 – 3.60 (m, 4H), 3.31 (dd, *J* = 7.6, 3.8 Hz, 2H), 2.59 – 2.52 (m, 2H), 2.46 (s, 4H), IR (cm<sup>-1</sup>): 2100 cm<sup>-1</sup>; ESI-MS: [M+H]<sup>+</sup> cal. for C<sub>6</sub>H<sub>13</sub>N<sub>4</sub>O 157.11, found 157.05.

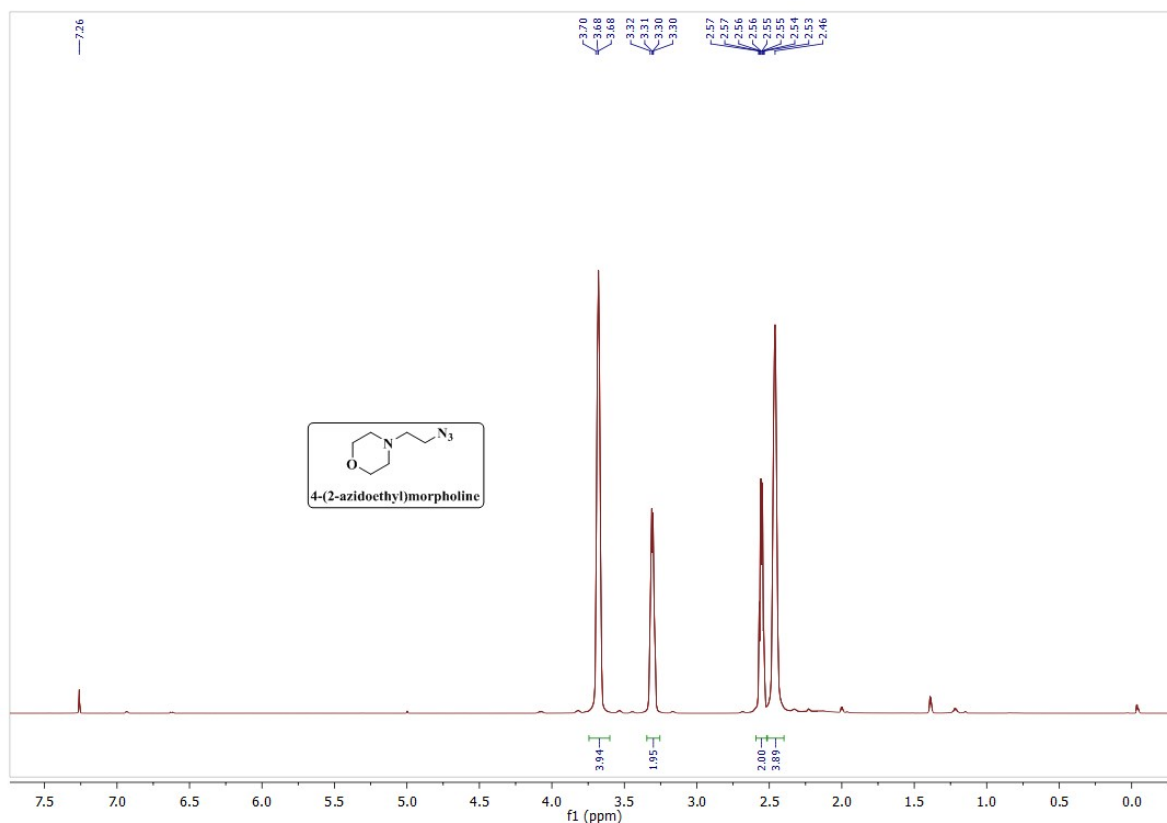

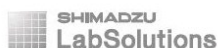

## MASS REPORT

Sample Name : JANA-156  
 Data File : 11102019.59.lcd  
 Date Acquired : 10/11/2019 4:29:46 PM  
 Batch File : 11102019.lcb

MS Spectrum  
 D:\DATA\OCT-19\1102019.59.lcd

Averaged ESI Positive+  
 Spectrum Mode: Averaged 0.083-0.330(31-121)  
 [CP%]

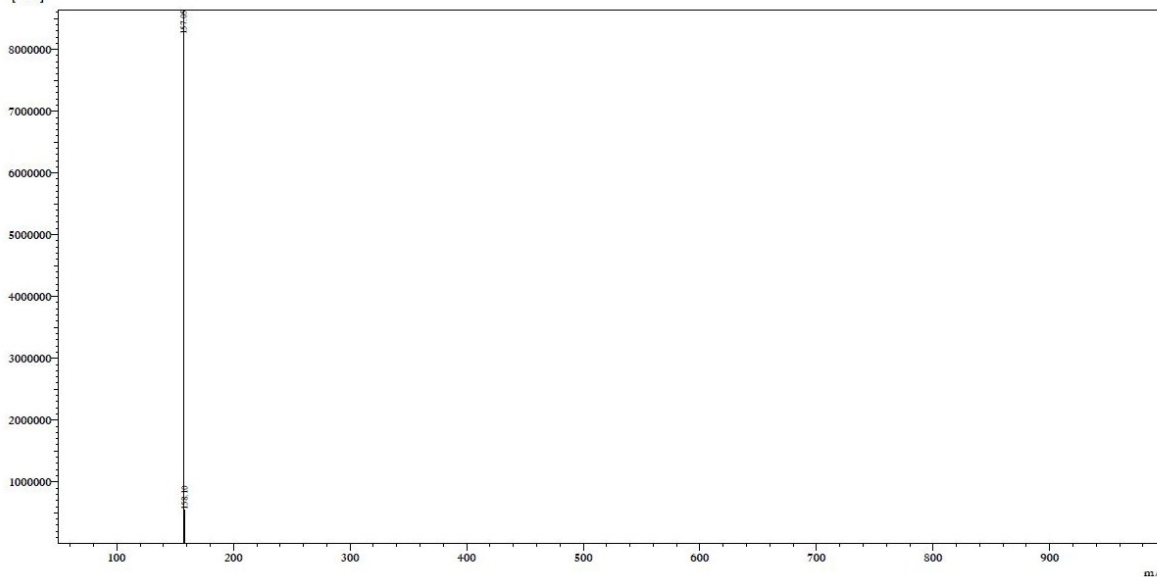

**2.2. Synthesis of 2-morpholinoethan-1-amine:** In a dry two neck round bottom flask 4-(2-azidoethyl)morpholine (200 mg, 1.3 mmol) was taken under  $N_2$  atmosphere in 10 mL of dry methanol. Then 10 mol% of Pd/C (13 mg, 0.13 mmol) was added to the reaction mixture under  $N_2$  atmosphere followed by insertion of a needle connected to hydrogen ( $H_2$ ) balloon. The reaction mixture was left for stirring at 30 °C for 18 h. After the completion of the reaction  $H_2$  balloon was removed and reaction mixture was filtered through celite with 20 mL of methanol. Filtrate was concentrated under rotary evaporator and the mass obtained was again dissolved in ethyl acetate followed by filtration through celite to get the charcoal free yellow oil (128 mg, 77% yield) which was used for the next reaction without purification.  $^1H$  NMR (400 MHz,  $CDCl_3$ )  $\delta$  = 3.75 – 3.68 (m, 4H), 2.80 (t,  $J$  = 6.1 Hz, 2H), 2.48 – 2.39 (m, 6H); IR ( $cm^{-1}$ ): 3420, 1666, 1299, and 1115; ESI-MS:  $[M+H]^+$  cal. for  $C_6H_{15}N_2O$  131.12, found 131.05.

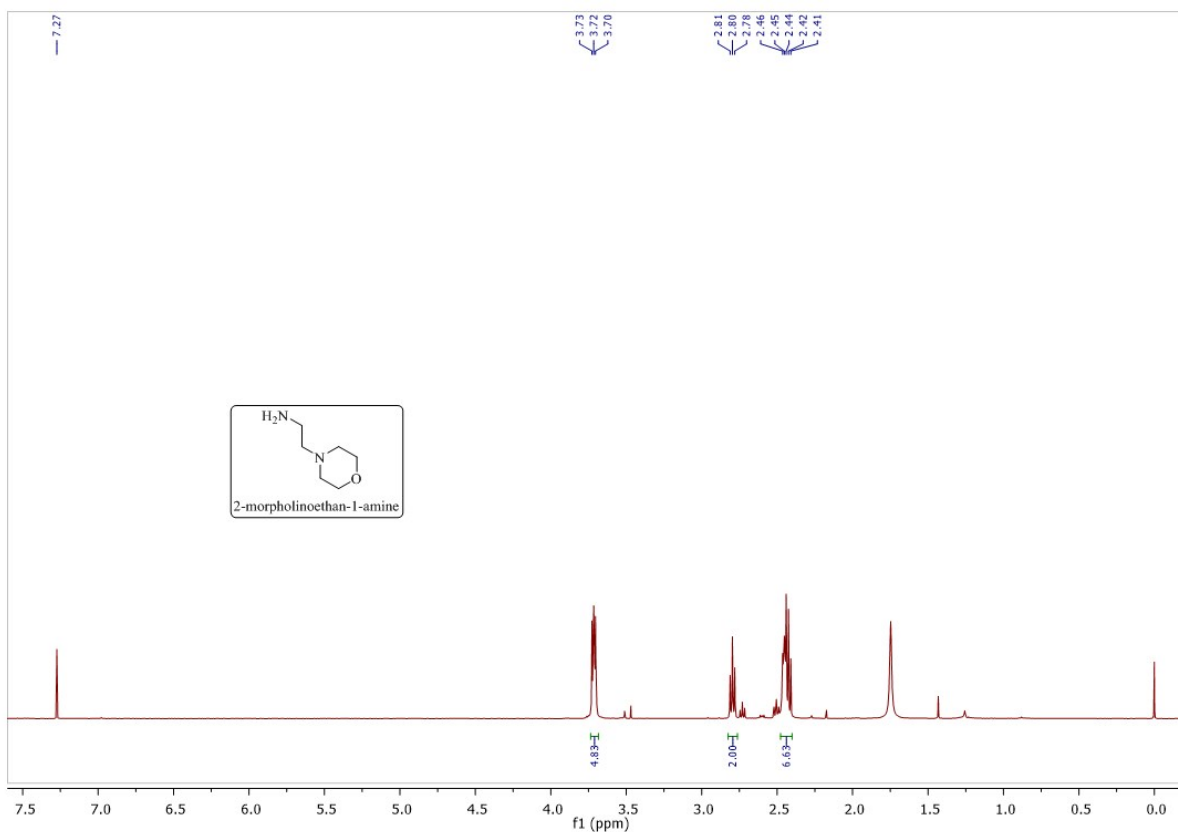

DSPC, Dr RATHOD

SHIMADZU  
LabSolutions

## MASS REPORT

Sample Name : JANA-130  
Data File : 11102019.64.Icd  
Date Acquired : 10/11/2019 4:42:45 PM  
Batch File : 11102019.lcb

MS Spectrum  
D:\DATA\OCT-19\11102019.64.Icd

Averaged ESI Positive+  
Spectrum Mode: Averaged 0.094-0.325(35-119)

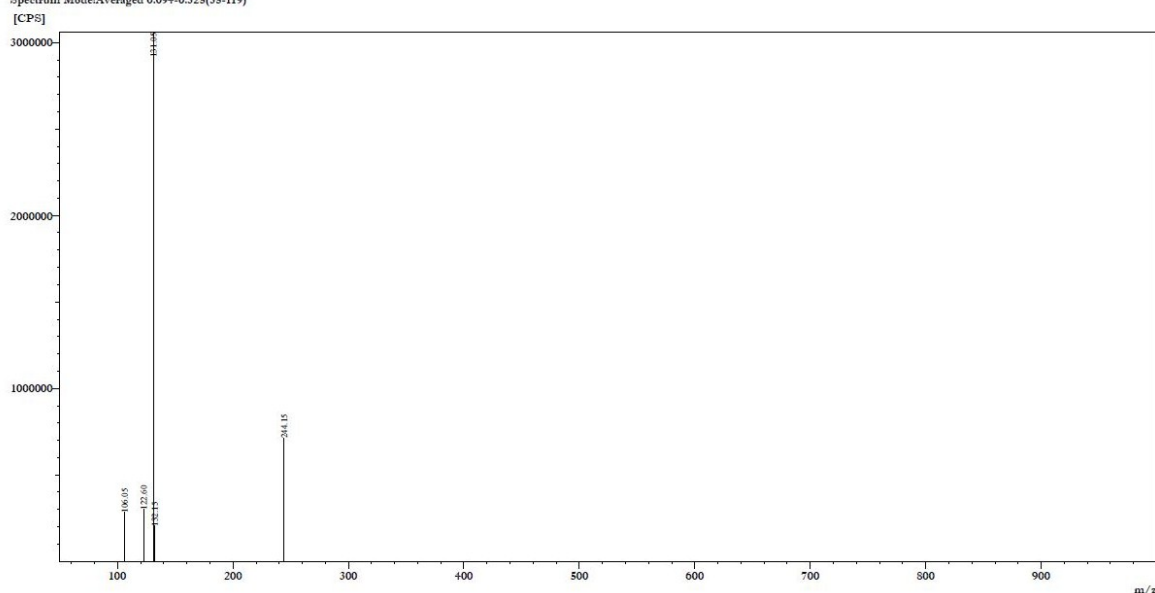

**2.3. Synthesis of *N*-(2,6-di-isopropylphenyl)perylene-3,4-dicarboximide:** A mixture of perylene-3,4,9,10-tetracarboxylic dianhydride (1.8 g, 4.65 mmol), imidazole (9.3 g, 137.3 mmol), zinc acetate dihydrate (0.660 g, 3.6 mmol), water (4 mL, 225 mmol) and 2,6-

diisopropylaniline (0.451 g, 2.55 mmol) was heated in a 100 mL autoclave at 190 °C for 24 h. After completion of the reaction, the reaction mixture was washed out from the reaction vessel with ethanol followed by concentrated HCl was added and ethanol was evaporated. The brown red solid was collected by vacuum filtration, which was dried and purified by column chromatography using chloroform over silica gel yielding 1.425 g (65%) as a red solid.  $^1\text{H NMR}$  (400 MHz,  $\text{CDCl}_3$ )  $\delta$ = 8.65 (d,  $J$  = 8.1 Hz, 2H), 8.45 (t,  $J$  = 7.3 Hz, 4H), 7.91 (d,  $J$  = 8.0 Hz, 2H), 7.64 (t,  $J$  = 7.8 Hz, 2H), 7.53 – 7.43 (m, 1H), 7.34 (d,  $J$  = 7.8 Hz, 2H), 2.77 (m, 2H), 1.19 (d,  $J$  = 6.9 Hz, 12H); IR ( $\text{cm}^{-1}$ ): 1654.

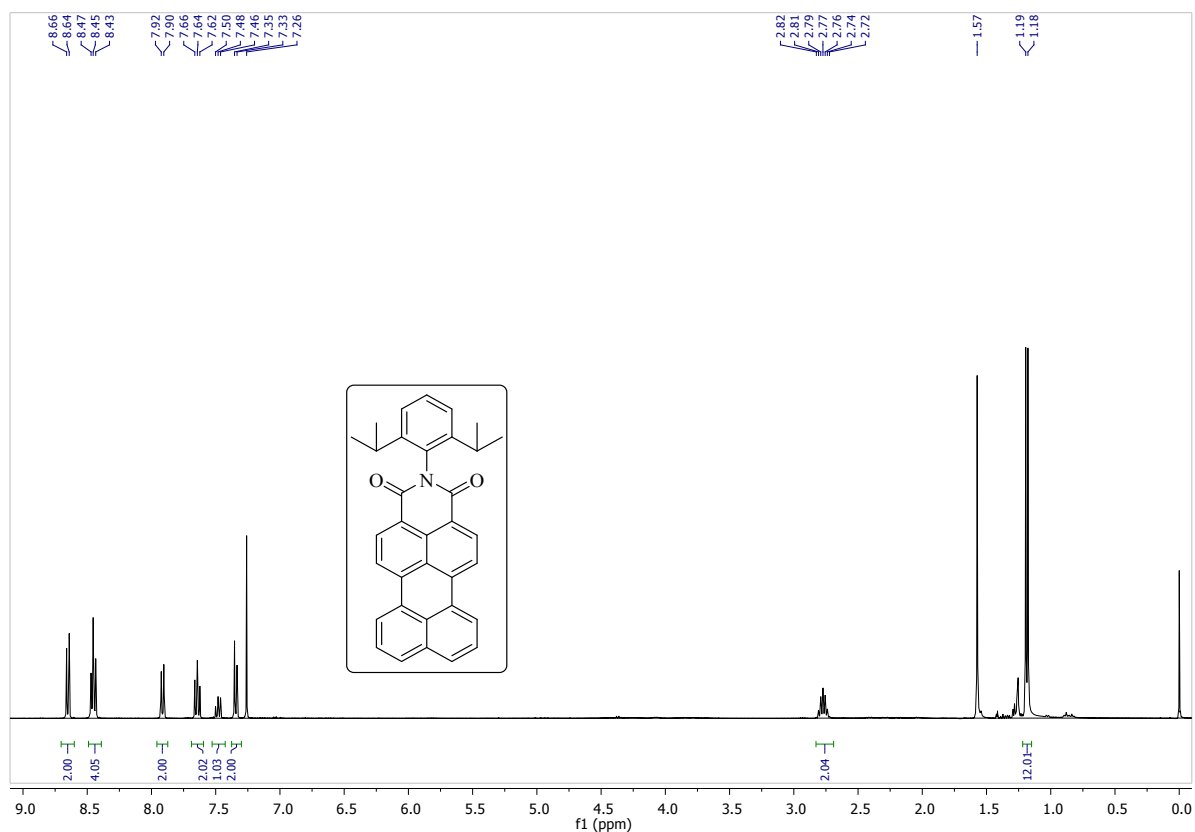

#### 2.4. Synthesis of *N*-(2,6-diisopropylphenyl)perylene-3,4-dicarboximide (1):

*N*-(2,6-di-isopropylphenyl)perylene-3,4-dicarboximide (1.0 g, 2.07 mmol) was dissolved in 100 mL chlorobenzene followed by  $\text{Br}_2$  (0.24 mL, 22.4 mmol) was added via syringe, and the reaction mixture was stirred for 10 min at rt. The reaction mixture was washed with 100 mL sodium thiosulfate solution twice and with 100 mL water once. The organic layer was concentrated on a rotary evaporator. The crude reaction mixture was purified via column chromatography using toluene as the eluent, yielding 1.033 g (89%) as a red solid.  $^1\text{H NMR}$  (400 MHz,  $\text{CDCl}_3$ )  $\delta$  = 8.68 (d,  $J$  = 5.9 Hz, 1H), 8.66 (d,  $J$  = 5.9 Hz, 1H), 8.52 (d,  $J$  = 7.7 Hz, 1H), 8.48 (d,  $J$  = 8.1 Hz, 1H), 8.44 (d,  $J$  = 8.1 Hz, 1H), 8.33 (d,  $J$  = 8.5 Hz, 1H), 8.27 (d,  $J$  = 8.2 Hz, 1H), 7.93 (d,  $J$  = 8.1 Hz, 1H), 7.75 (t,  $J$  = 8.0 Hz, 1H), 7.50 – 7.45 (m, 1H), 7.34 (d,  $J$  = 7.8 Hz, 2H), 2.76 (m, 6.8 Hz, 2H), 1.18 (d,  $J$  = 6.9 Hz, 12H); IR ( $\text{cm}^{-1}$ ): 1658.

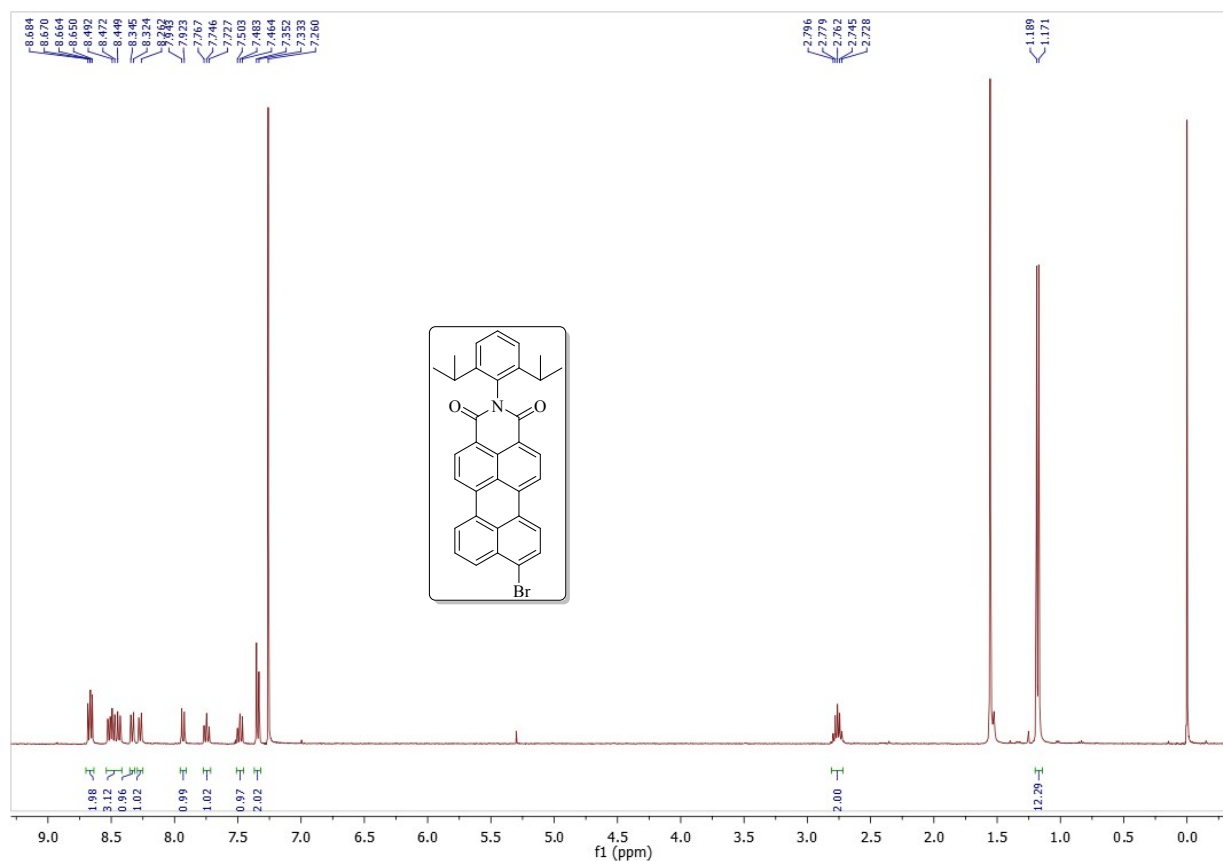

**2.5. Synthesis of 2-(2,6-diisopropylphenyl)-8-((2-morpholinoethyl)amino)-1H-benzo[10,5]anthra[2,1,9-def]isoquinoline-1,3(2H)-dione:** In a flame dry round bottom flask Pd<sub>2</sub>(dba)<sub>3</sub> (8 mg) and 2,2'-bis(diphenylphosphino)-1,1'-binaphthyl (BINAP) (26 mg) was taken in 2 mL of dry toluene under N<sub>2</sub> atmosphere and the mixture was stirred for 30 min under heating condition. Then the bromide **1** (50 mg) was added to the aliquot followed by addition of 2-morpholinoethan-1-amine (13 mg) and 1.5 equiv potassium tert-butoxide (26 mg). The reaction mixture was refluxed at 110 °C for 4 hour. A deep blue color appeared with the indication of the formation of desired amine compound. The progress of the reaction was monitored by TLC using the mobile phase of 5 % of MeOH in DCM. After the completion of the reaction, it was filtered through celite. To the filtrate ethyl acetate was added and washed with water (25 mL X 2) and brine (25 mL). Organic layer was collected and dried over anhydrous sodium sulfate. Solvent was evaporated to dryness under rotary evaporator to get the crude mass. The crude was column chromatographed on silica gel of M 230-400 to get the compound **2** (35 mg, 70% of isolated yield). <sup>1</sup>H NMR (400 MHz, CDCl<sub>3</sub>) δ = 8.60 – 8.53 (m, 2H), 8.47 (d, 1H), 8.34 (d, *J* = 4.5 Hz, 2H), 8.15 (d, *J* = 7.9 Hz, 1H), 7.93 (d, *J* = 7.8 Hz, 1H), 7.62 (t, *J* = 7.5 Hz, 1H), 7.47 (t, *J* = 7.8 Hz, 1H), 7.33 (d, *J* = 7.8 Hz, 2H), 6.69 (d, *J* = 7.9 Hz, 1H), 6.03 (s, 1H), 3.89 – 3.76 (m, 4H), 3.46 (s, 2H), 2.90 (s, 2H), 2.78 (m, 2H), 2.63 (s, 4H), 1.18 (d, *J* = 6.8 Hz, 12H). <sup>13</sup>C NMR (175 MHz, CDCl<sub>3</sub>) δ 164.26, 164.21, 145.75, 139.18, 138.13, 132.38, 131.86, 131.78, 131.46, 131.10, 129.65, 129.35, 129.20, 128.77, 127.99, 127.07, 126.56, 125.91, 125.76, 124.63, 124.04, 123.88, 123.29, 120.39, 119.24, 117.89, 117.31, 105.75, 68.18, 66.95, 56.27, 53.15, 38.92, 29.18, 29.05,

24.05. IR (cm<sup>-1</sup>): 3422, 1654, ESI-HRMS: cal. for C<sub>40</sub>H<sub>40</sub>N<sub>3</sub>O<sub>3</sub> [M+H]<sup>+</sup> = 610.3070, found 610.3067.

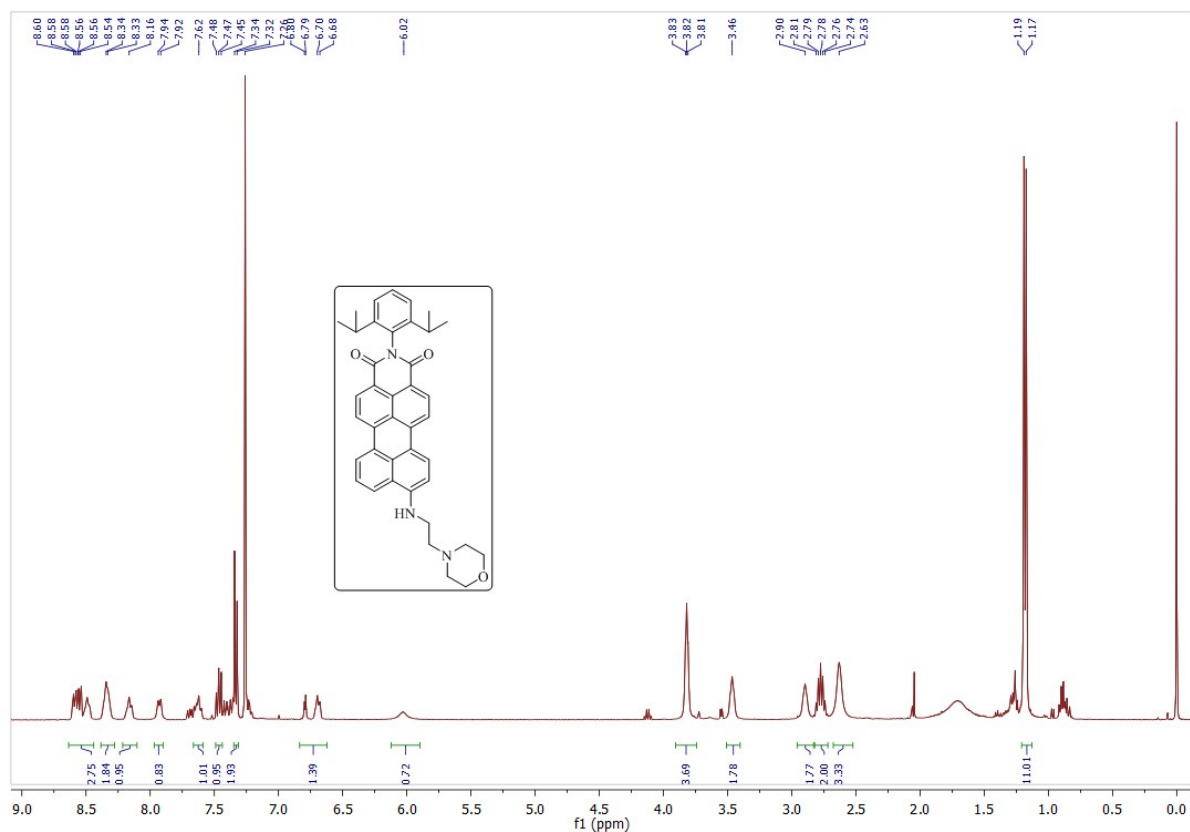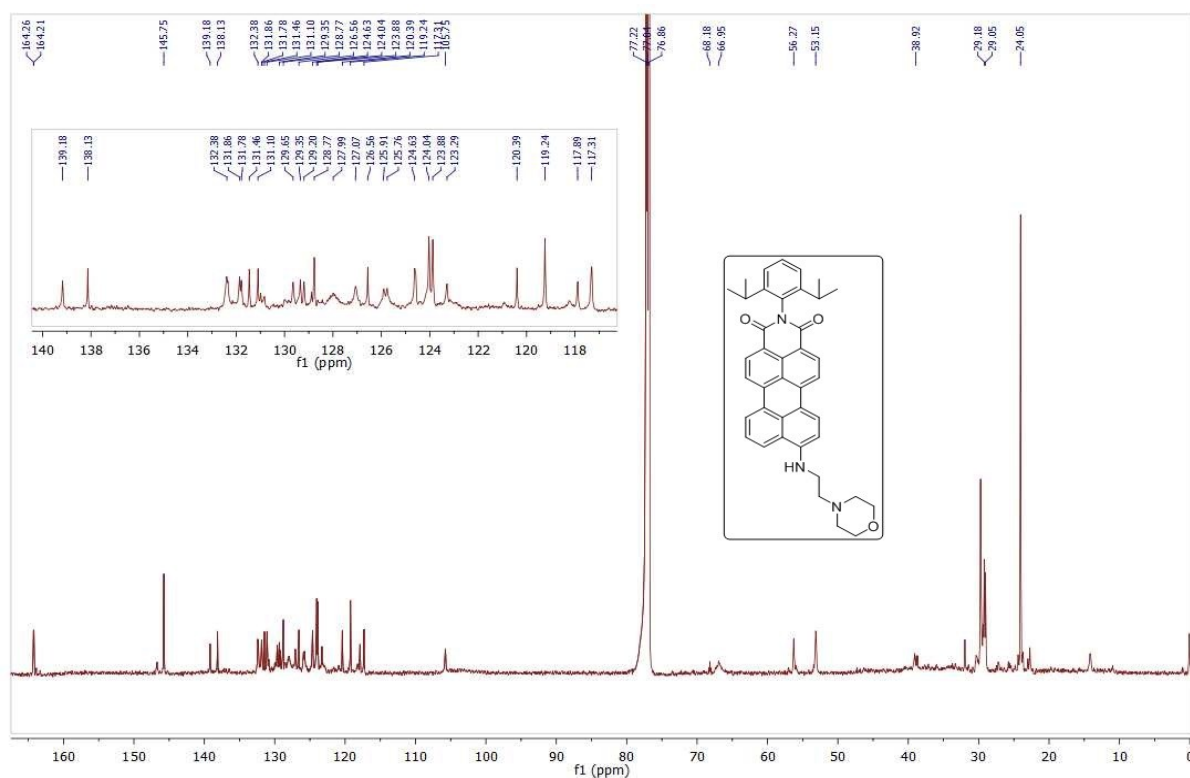



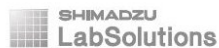

## MASS REPORT

Sample Name : JANA-B-610  
Data File : 300818.4.lcd  
Date Acquired : 8/30/2018 10:55:24 AM  
Batch File : 300818.1.lcb

MS Spectrum  
D:\DATA\AUGUST-18\300818.4.lcd

Averaged ESI Positive+  
Spectrum Mode: Averaged 0.153-0.510(62-205)

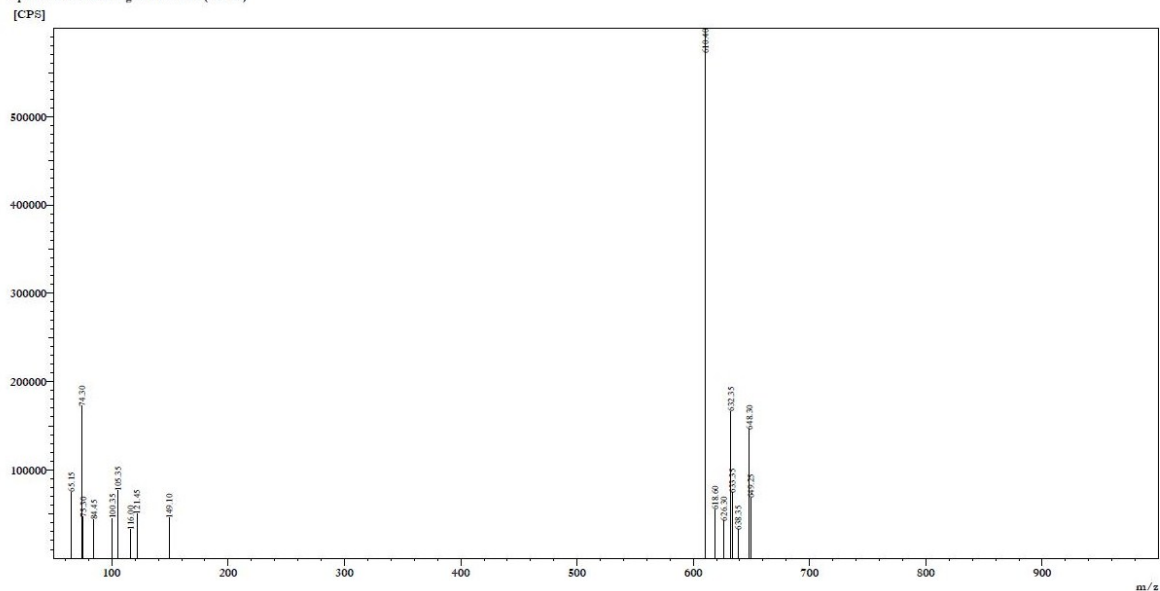

## HRMS

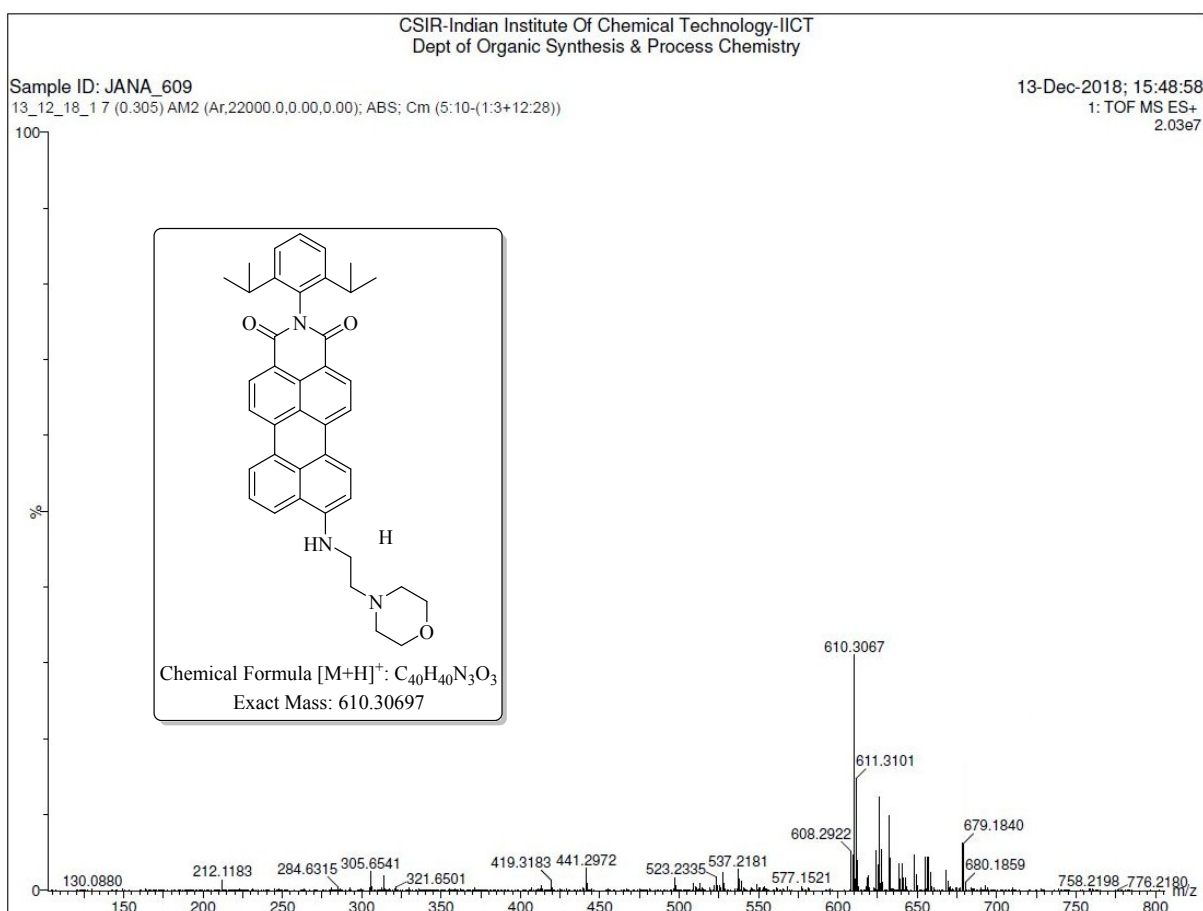

### Single Mass Analysis

Tolerance = 5.0 PPM / DBE: min = -1.5, max = 50.0

Element prediction: Off

Number of isotope peaks used for i-FIT = 3

Monoisotopic Mass, Even Electron Ions

13 formula(e) evaluated with 1 results within limits (all results (up to 1000) for each mass)

Elements Used:

C: 0-40 H: 0-40 N: 0-3 O: 0-3 Na: 0-1

| Minimum: |            |      |      |      |       |      |          |               |  |      |
|----------|------------|------|------|------|-------|------|----------|---------------|--|------|
| Maximum: | 5.0        | 5.0  |      |      |       |      |          |               |  | -1.5 |
|          |            |      |      |      |       |      |          |               |  | 50.0 |
| Mass     | Calc. Mass | mDa  | PPM  | DBE  | i-FIT | Norm | Conf (%) | Formula       |  |      |
| 610.3067 | 610.3070   | -0.3 | -0.5 | 22.5 | 131.8 | n/a  | n/a      | C40 H40 N3 O3 |  |      |

HPLC analysis reveals the purity of the probe 2 is more than 96%.

## SHIMADZU LabSolutions Analysis Report

### <Sample Information>

|                  |                        |              |                        |
|------------------|------------------------|--------------|------------------------|
| Sample Name      | : sample-1             | Sample Type  | : Unknown              |
| Sample ID        | : sample=1             | Acquired by  | : System Administrator |
| Data Filename    | : 09012019005.lcd      | Processed by | : System Administrator |
| Method Filename  | : Rakesh HPLC prep.lcm |              |                        |
| Batch Filename   | : Rakesh batch .lcb    |              |                        |
| Vial #           | : 1-1                  |              |                        |
| Injection Volume | : 20 uL                |              |                        |
| Date Acquired    | : 09/01/2019 13:34:58  |              |                        |
| Date Processed   | : 10/01/2019 17:49:31  |              |                        |

### <Chromatogram>

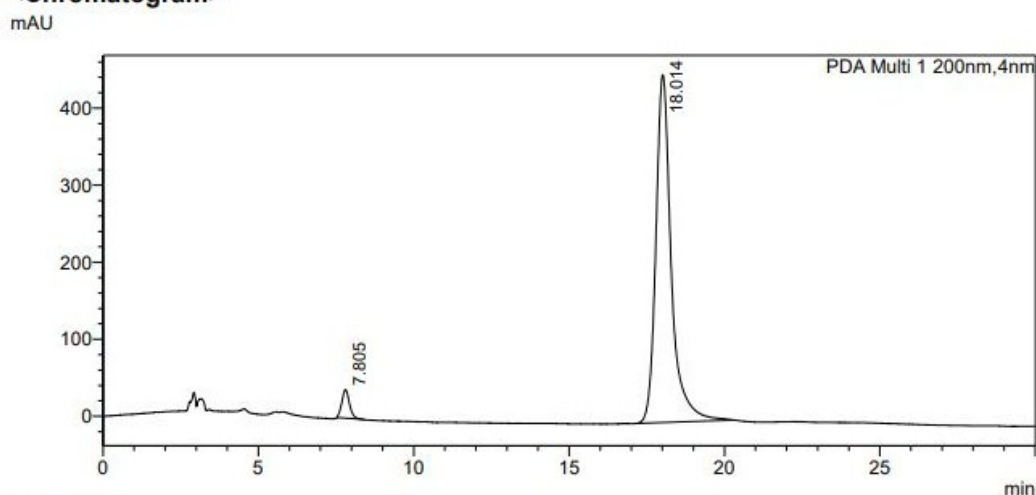

### <Peak Table>

| Peak# | Ret. Time | Area     | Height | Height% | Area%   |
|-------|-----------|----------|--------|---------|---------|
| 1     | 7.805     | 632266   | 37035  | 7.585   | 3.907   |
| 2     | 18.014    | 15548701 | 451248 | 92.415  | 96.093  |
| Total |           | 16180967 | 488284 | 100.000 | 100.000 |

### 3. Photophysical properties of Probe 2

The absorption and emission spectra of the probe **2** ( $1 \times 10^{-5}$  M) was recorded in different solvent systems (both organic solvents and in binary mixture of acetonitrile in different percentage of water). The pH-dependent emission spectra of probe **2** were measured in various pH (5% acetonitrile (v/v) in phosphate buffer in MES) starting from pH 3 to 8. Emission spectra were recorded on exciting the molecule at 610 nm in every case.

### 4. Cell Culture

Cancerous cell lines MCF-7 (Michigan Cancer Foundation-7), GL-261 (Glioma-261), RKO (rectal carcinoma), U87 (Uppsala 87 Malignant Glioma), CT26 (mus musculus colon carcinoma) and the non cancerous cell line CHO (Chinese Hamster Ovary) and HEK-293 (Human embryonic kidney 293) cells were cultured in DMEM (Dulbecco Modified Eagle Medium) media (Gibco) supplemented with 10% (v/v) fetal bovine serum, 1% L-glutamine, 1% non-essential amino acid, 1% penicillin, and 1% streptomycin. All cells were maintained in a humidified 5% CO<sub>2</sub> incubator at 37 °C.

### 5. Cytotoxic studies using MTT assay

The *in vitro* cytotoxic studies of probe **2** have been carried out using the MTT (3-(4,5-dimethylthiazole-2-yl)-2,5-diphenyltetrazolium bromide) assay. Briefly, cancerous cell line MCF7 and GL261 as well as normal cell line CHO were grown separately in their log phase. Cells were seeded in 96-well plates in Dulbecco's modified Eagle's medium (DMEM) containing 10% fetal bovine serum (FBS) for 8 h. Different concentrations (1.25-40 μm) of probe **2** in HEPES buffer containing 5% DMSO were added and incubated at 37 °C in 5% CO<sub>2</sub> for different time intervals (24h, 48h and 72h). Then cytotoxicity was measured using the MTT assay. It was evident from the MTT assay data that the probe **2** showed no toxicity to the corresponding cell lines (**Figure: S1a-c**).

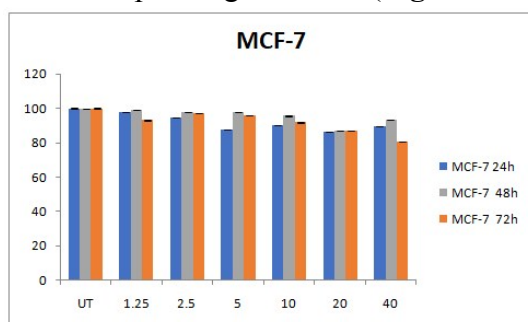

**Figure S1a.** Comparative cell viability study of probe **2** on MCF7 cell line in different time intervals 24h, (blue bar) 48h, (grey bar) and 72h. (orange bar) at different concentrations.

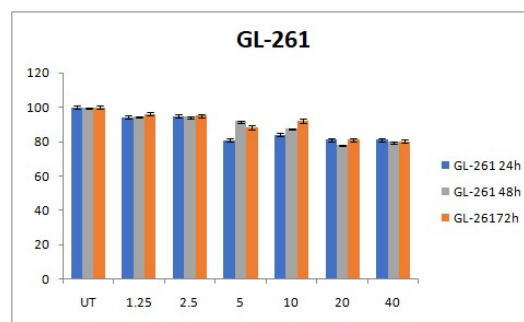

**Figure S1b** Comparative cell viability study of probe **2** on GL261 cell line in different time intervals 24h, (blue bar) 48h, (grey bar) and 72h. (orange bar) at different concentrations.

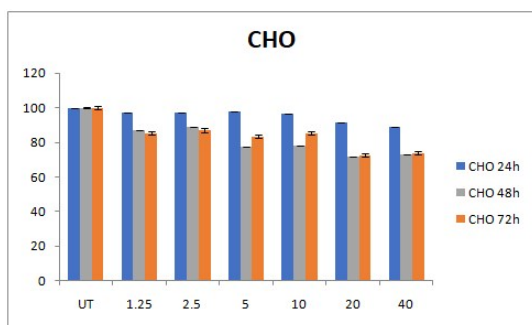

**Figure S1c.** Comparative cell viability study of Probe 2 on CHO cell line in different time intervals 24h, (blue bar) 48h, (grey bar) and 72h. (orange bar) at different concentrations.

### 6. Cellular uptake study using confocal microscopy:

The degrees of cellular uptake for the Probe 2 in cancer cells and non cancerous cells were studied qualitatively by confocal microscopy. Briefly, MCF-7, U87, CT26, RKO, GL261, CHO, and HEK-293 cells were seeded ( $5 \times 10^4$ ) in 35 mm cover glass with 1 mL of growth medium for 12 h than cell were washed with 1x PBS ( $3 \times 1$  mL) and treated with probe 2 ( $2 \mu\text{M}$ ) for 4 h. cells were washed with 1x PBS ( $3 \times 1$  mL) then fixed with 4% paraformaldehyde and cell nuclei were stained with DAPI. Mount on cover slip onto glass slide and images were recorded by confocal microscopy (Nikon Ti Eclipse). Representative images are shown in the **Figure S2**.

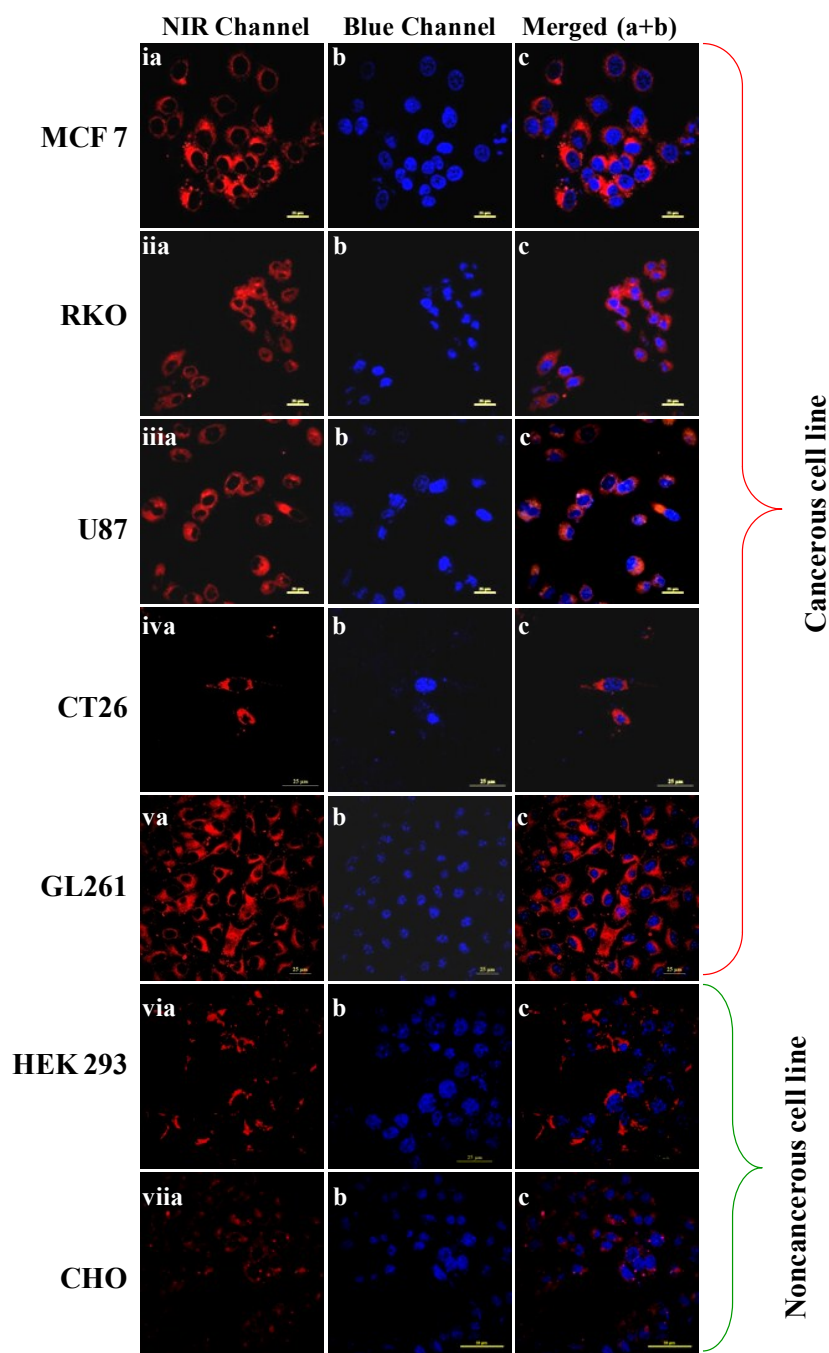

**Figure S2.** CLSM images of (i) MCF-7, (ii) RKO, (iii) U87, (iv) CT26, (v)GL261, (vi) HEK 293 and (vii) CHO cell lines incubated with probe 2 and DAPI: (a) NIR channel, (b) blue channel and (d) merged images. Scale bar 25µm. All images were taken keeping the microscopic parameter the same.

### 7. Intra cellular distribution of probe 2 in MCF 7 cell line:

Intra cellular localization of the probe 2 by cancerous MCF-7 cell line was monitored by confocal laser scanning microscopy (CLSM). The cells were cultured following the standard protocols and was incubated with the probe 2 (2 µM) under 5% CO<sub>2</sub> at humidified conditions at 37 °C for 4 h. Thereafter, cells were fixed in paraformaldehyde for 15 min and after washing three times with PBS, cell nucleus were stained with 4,6-diamidino-2-phenylindole (DAPI) and the lysosome and mitochondria were stained separately with lysotracker green and myotracker green respectively. Imaging was done by Nikon confocal microscope (Eclipse Ti-E) using the respective filter.

**Table S1.** Pearson's correlation coefficient (Rr), overlap coefficient (R), overlap coefficients k1 and k2, and colocalization coefficients M1 and M2 were calculated on the set of computer-simulated images shown in the manuscript.

| <b>Fig No.</b>    | <b>Pearson's correlation coefficient (Rr)</b> | <b>Overlap coefficient (R)</b> | <b>Overlap coefficients k1</b> | <b>Overlap coefficients k2</b> | <b>Colocalization coefficients M1</b> | <b>Colocalization coefficients M2</b> |
|-------------------|-----------------------------------------------|--------------------------------|--------------------------------|--------------------------------|---------------------------------------|---------------------------------------|
| <b>Fig 2.ie</b>   | 0.888                                         | 0.887                          | 0.713                          | 1.105                          | 1.00                                  | 0.916                                 |
| <b>Fig 2.iie</b>  | 0.649                                         | 0.467                          | 1.013                          | 0.744                          | 0.991                                 | 0.416                                 |
| <b>Fig 2.iiie</b> | 0.940                                         | 1.026                          | 0.872                          | 0.964                          | 0.994                                 | 0.568                                 |
| <b>Fig 2.ive</b>  | 0.547                                         | 0.654                          | 0.900                          | 0.475                          | 1.000                                 | 0.999                                 |
| <b>Fig 5.if</b>   | 0.764                                         | 0.808                          | 0.550                          | 1.186                          | 0.978                                 | 0.999                                 |
| <b>Fig 5.iif</b>  | 0.814                                         | 0.832                          | 0.586                          | 1.182                          | 0.922                                 | 0.998                                 |
| <b>Fig 5.iiif</b> | 0.781                                         | 0.786                          | 0.446                          | 1.383                          | 0.924                                 | 0.990                                 |
| <b>Fig 5.ivf</b>  | 0.803                                         | 0.834                          | 0.541                          | 1.30                           | 0.888                                 | 0.996                                 |
| <b>Fig 5.vf</b>   | 0.844                                         | 0.856                          | 0.851                          | 0.861                          | 0.995                                 | 0.994                                 |
| <b>Fig 6.if</b>   | 0.965                                         | 0.966                          | 1.017                          | 0.917                          | 0.944                                 | 0.999                                 |
| <b>Fig 6.iif</b>  | 0.968                                         | 0.971                          | 0.956                          | 0.987                          | 0.958                                 | 0.995                                 |
| <b>Fig 6.iiif</b> | 0.956                                         | 0.958                          | 0.869                          | 1.056                          | 0.920                                 | 0.996                                 |

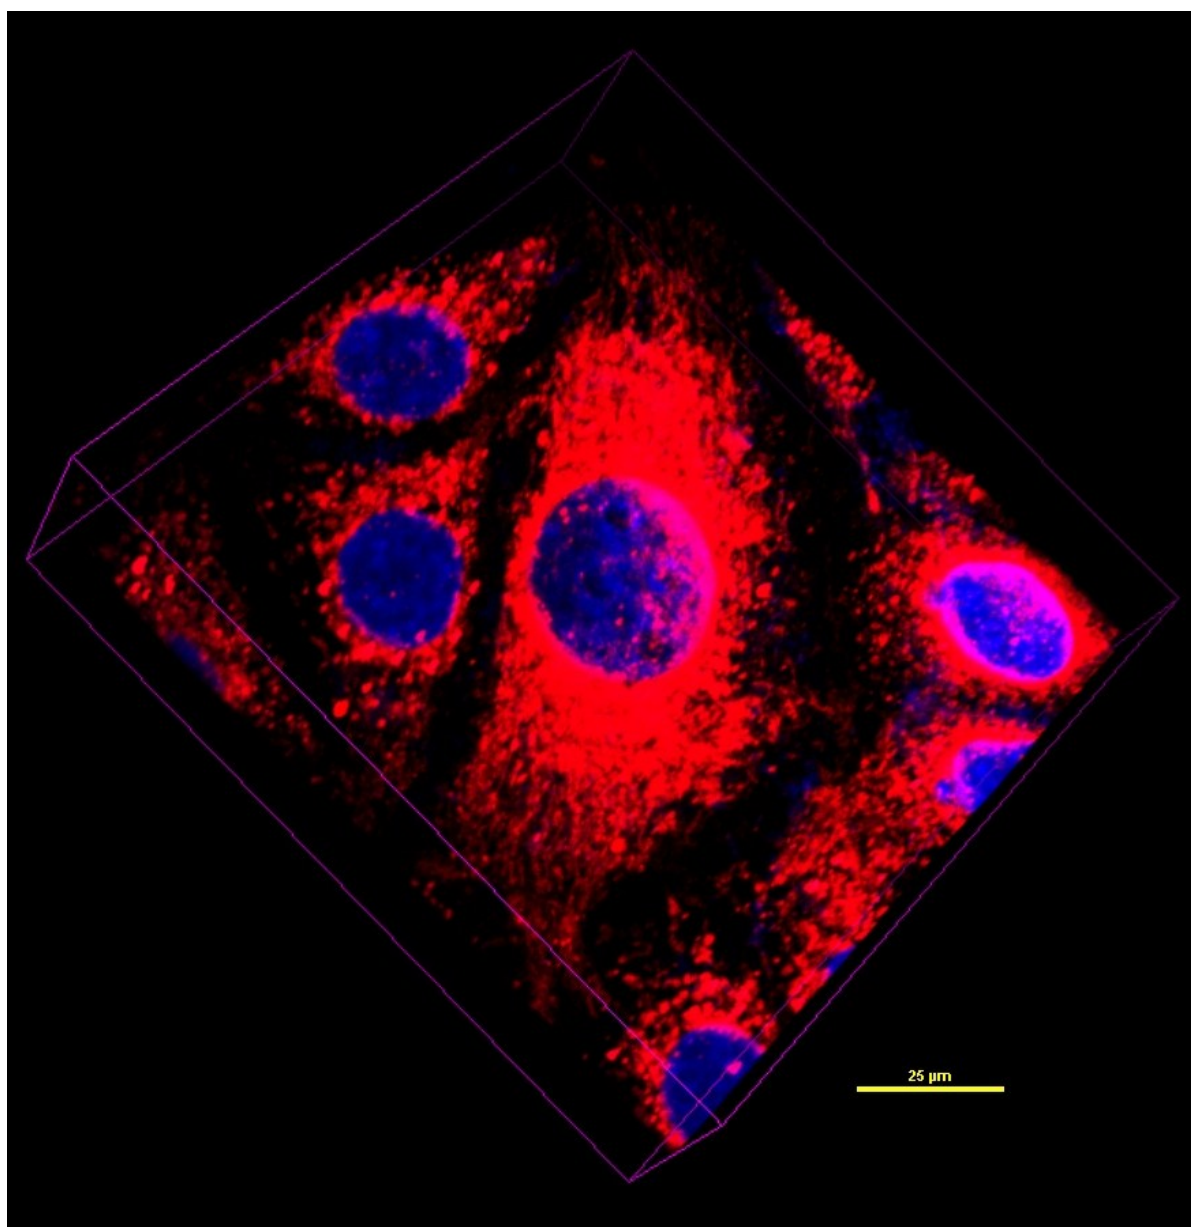

**Figure S3.** Confocal Z-stack image of fixed MCF-7 cell (cells incubated with the probe **2** and DAPI): Image was rotated and optically sectioned along the Z-axis to have a better visualization of the intra cellular distribution of the probe **2**. The image shows the probe **2** is distributed in the cytoplasm of the cell.



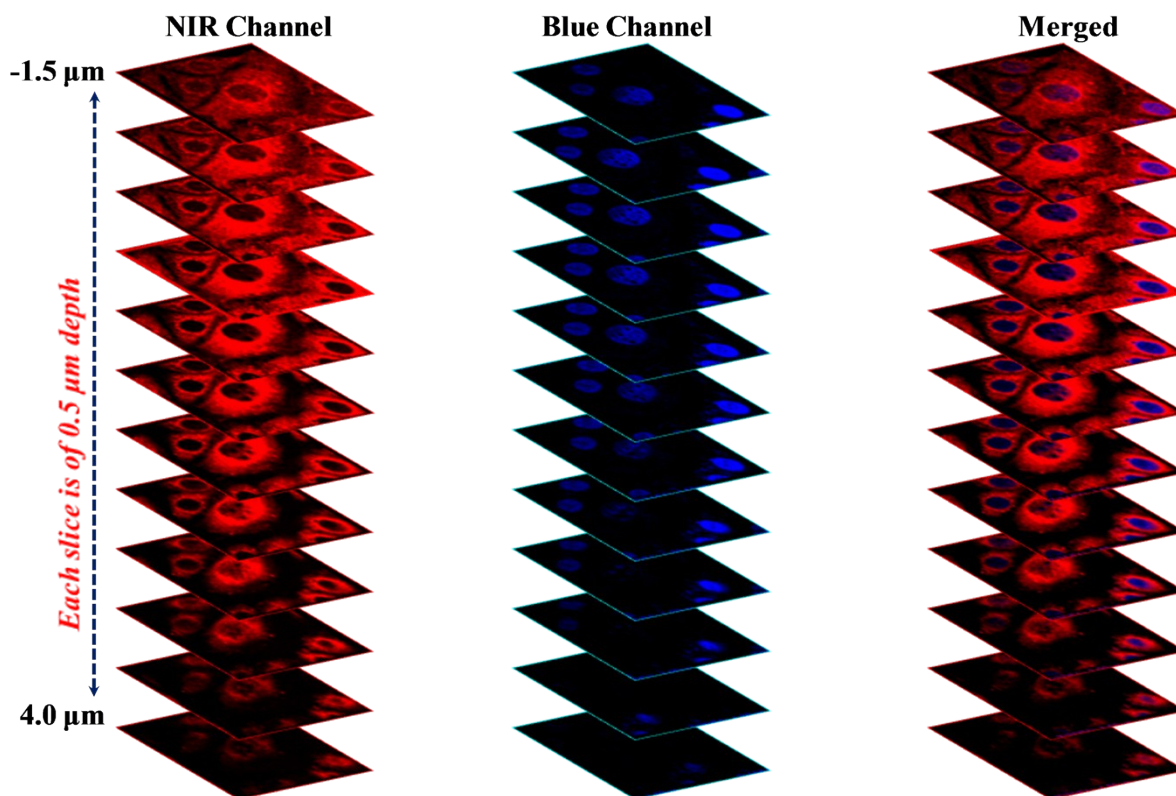

**Figure S4.** Confocal Z-stack images of MCF-7 cell (cell lines incubated with the probe **2** and DAPI): Image was rotated and optically sectioned (each section depth is 0.5μm) along the Z-axis to have a better visualization of the intra cellular distribution of the probe **2**. (a) NIR, (b) green, (c) blue channel and (d) merged images. From the images it can be clearly seen that the probe **2** is mostly located in the cytoplasm of the cell.



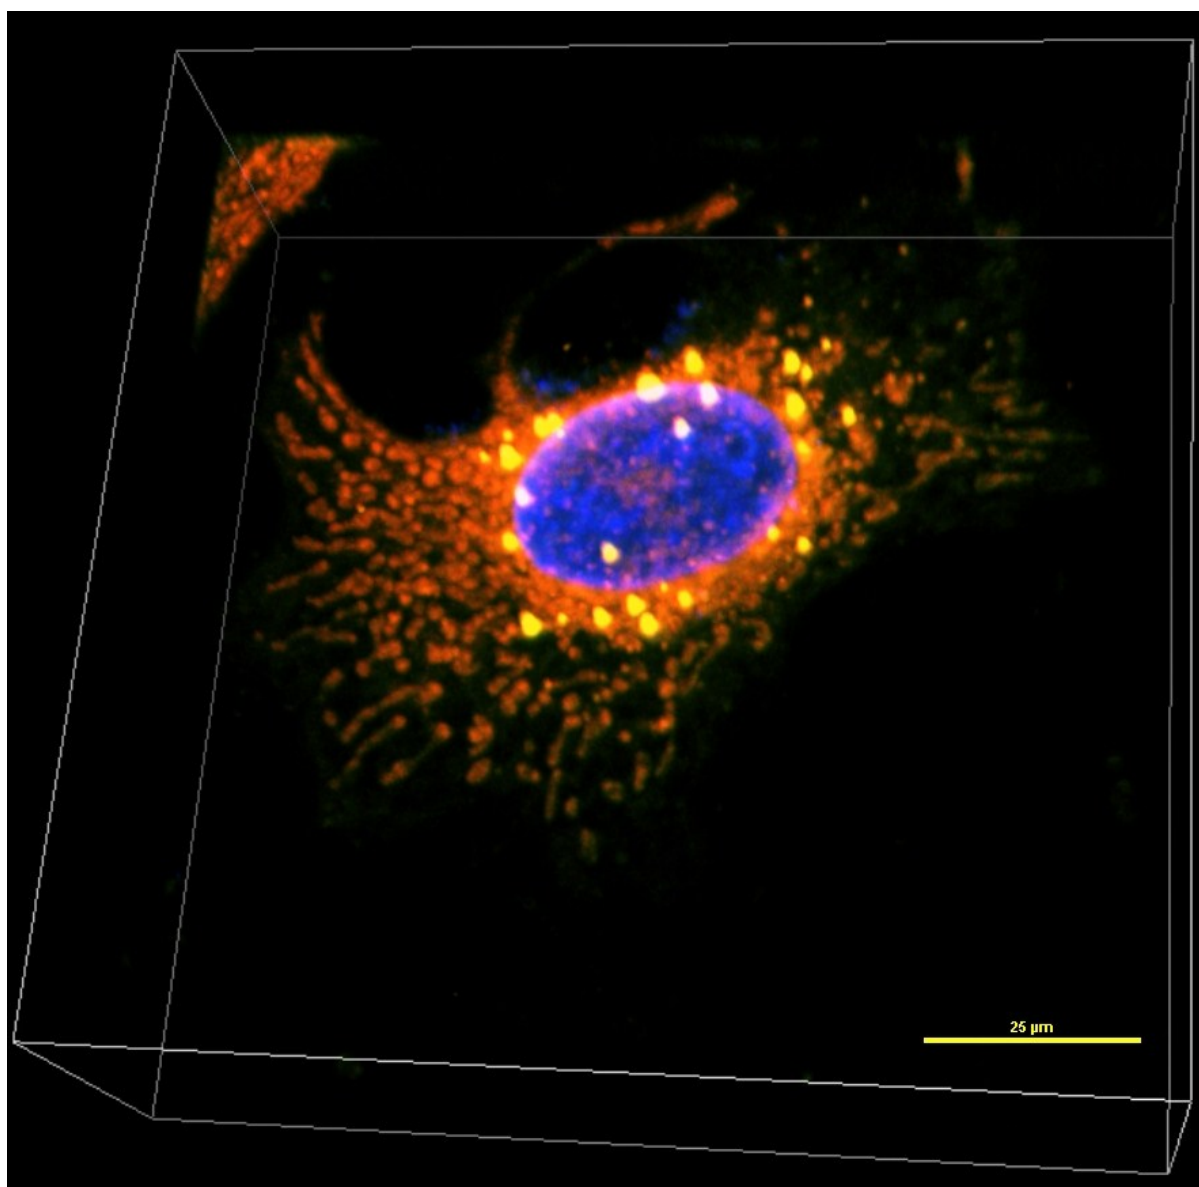

**Figure S5.** Confocal Z-stack images of MCF-7 cell (cells were incubated with the probe 2, DAPI, and lysotracker green): Image was rotated and optically sectioned along the Z-axis to have a better visualization of the intra cellular distribution of the probe 2. From the images it can be clearly seen that both the probe 2 and the lysotracker green are co-localized in the lysosome.

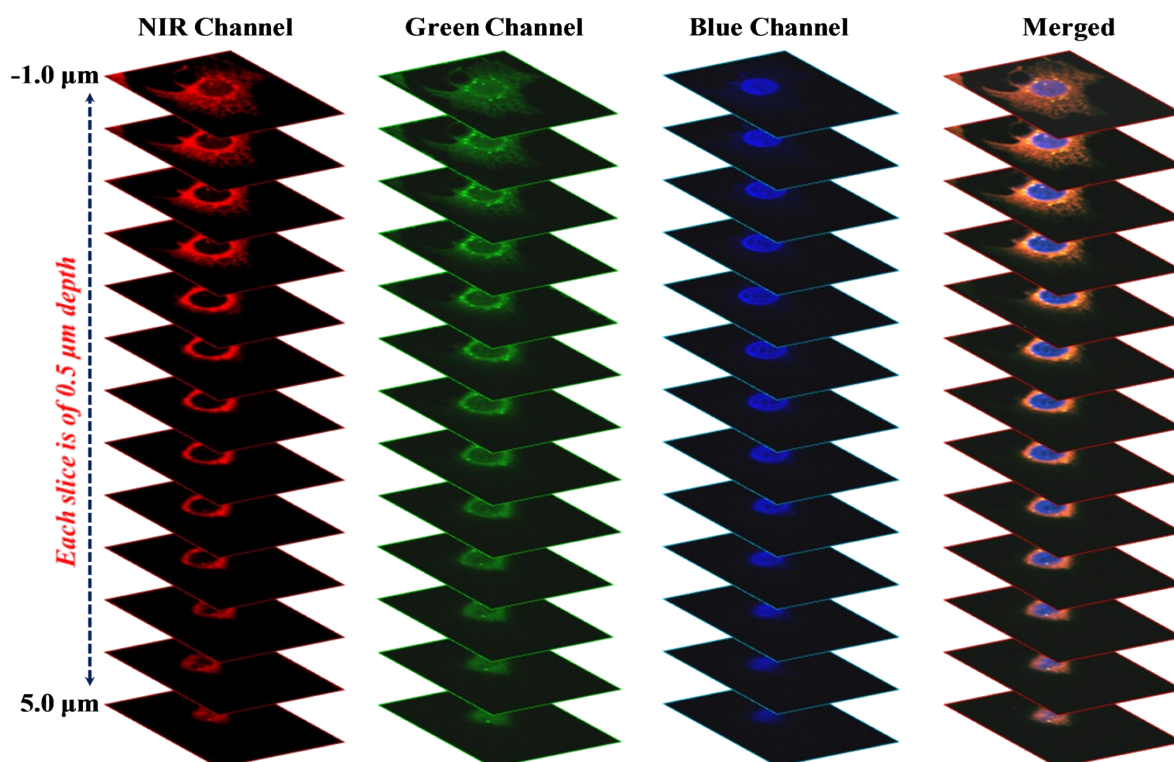

**Figure S6.** Confocal Z-stack images of MCF-7 cell (cell lines incubated with the probe **2**, DAPI, and lysotracker green): Image was rotated and optically sectioned (each section depth is 0.5μm) along the Z-axis to have a better visualization of the intra cellular distribution of the probe **2**. (a) NIR, (b) green, (c) blue channel and (d) merged images. From the images it can be clearly seen that both the probe **2** and the lysotracker green are co-localized in the lysosome.

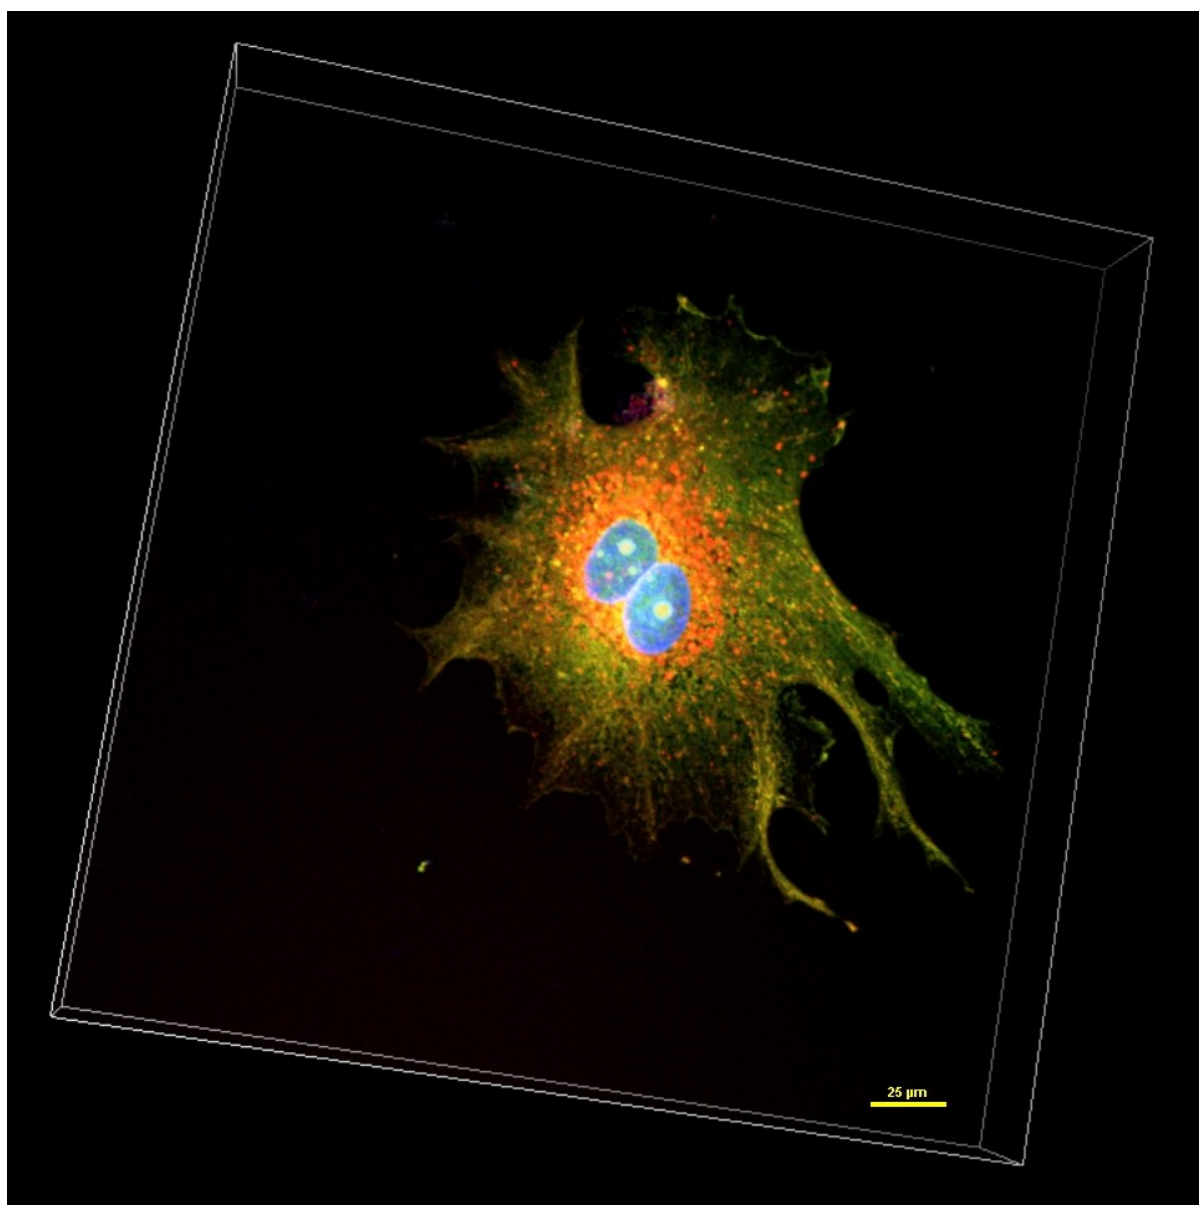

**Figure S7.** Confocal Z-stack images of MCF-7 cell (cell lines incubated with the probe **2**, DAPI, and mitotracker green): Image was rotated and optically sectioned along the Z-axis to have a better visualization of the intra cellular distribution of the probe **2**. From the images it can be clearly seen that the probe **2** and the myotracker green are located separately in the cell.

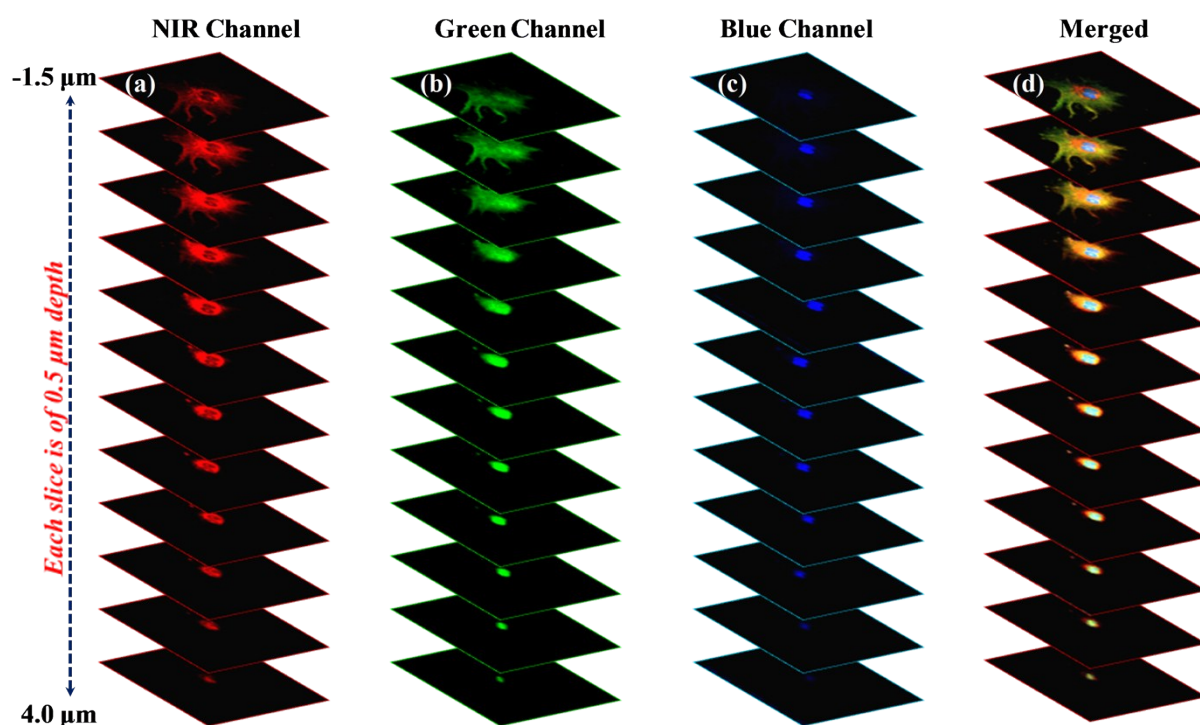

**Figure S8.** Confocal Z-stack images of MCF-7 cell (cell lines incubated with the probe **2**, DAPI, and mitotracker green): Image was rotated and optically sectioned (each section depth is 0.5μm) along the Z-axis to have a better visualization of the intra cellular distribution of the probe **2**. (a) NIR, (b) green, (c) blue channel and (d) merged images. From the images it can be clearly seen that the probe **2** and the myotracker green are located separately in the cell.

## 8. Intra cellular distribution of probe 2 in CHO cell line:

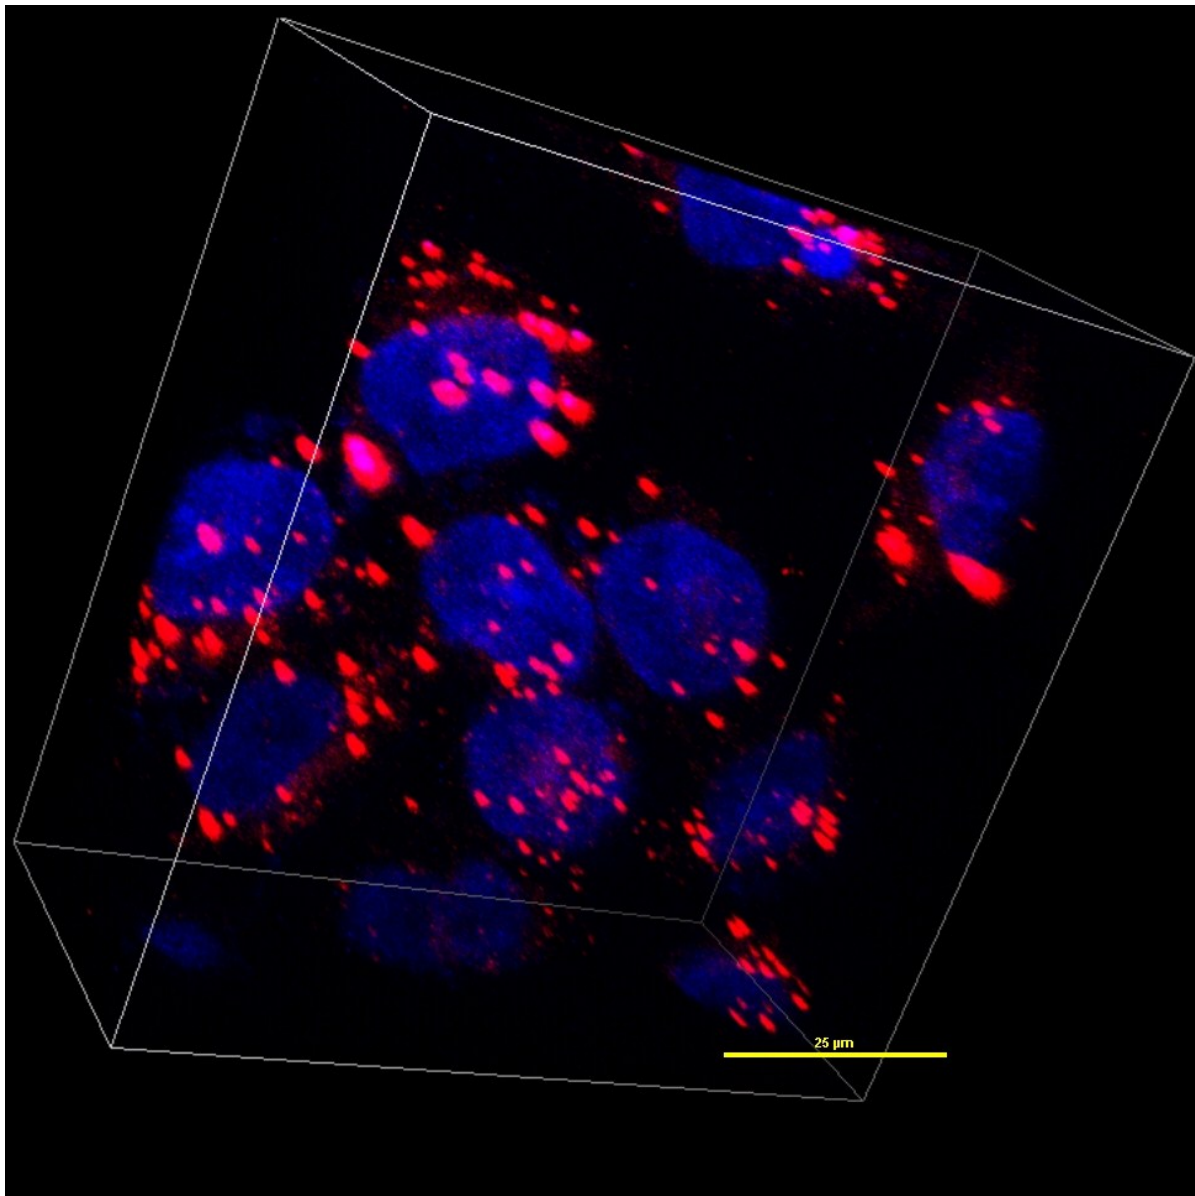

**Figure S9.** Confocal Z-stack image of fixed CHO cell (cells incubated with the probe 2 and DAPI): Image was rotated and optically sectioned along the Z-axis to have a better visualization of the intra cellular distribution of the probe 2. The image shows the probe 2 is distributed in the cytoplasm of the cell.



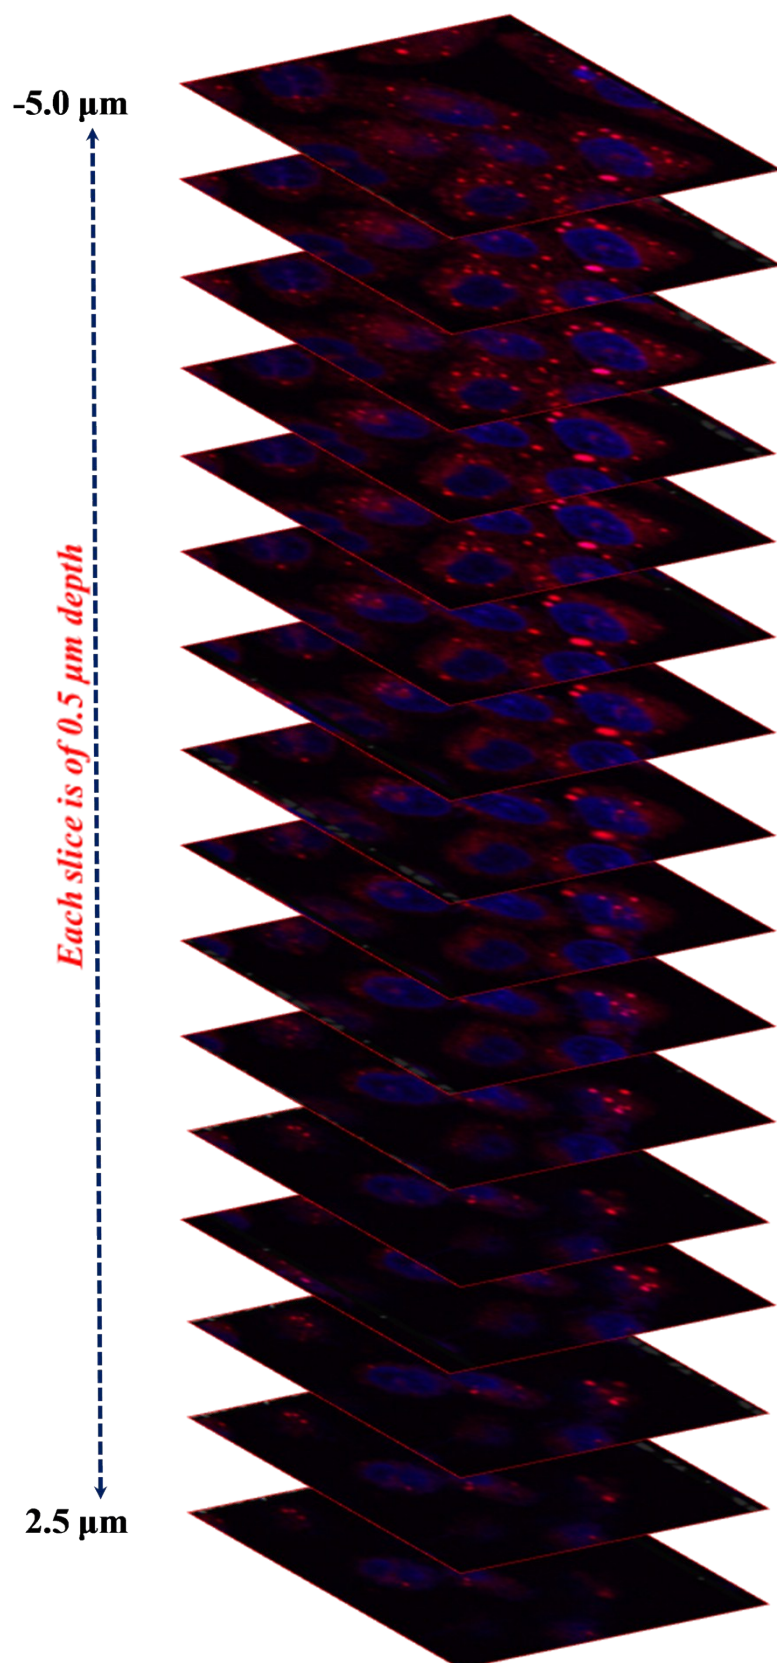

**Figure S10.** Confocal Z-stack images of CHO cell (cell lines incubated with the probe 2 and DAPI and: Image was rotated and optically sectioned (each section depth is 0.5μm) along the Z-axis to have a better visualization of the cellular distribution of the probe 2.

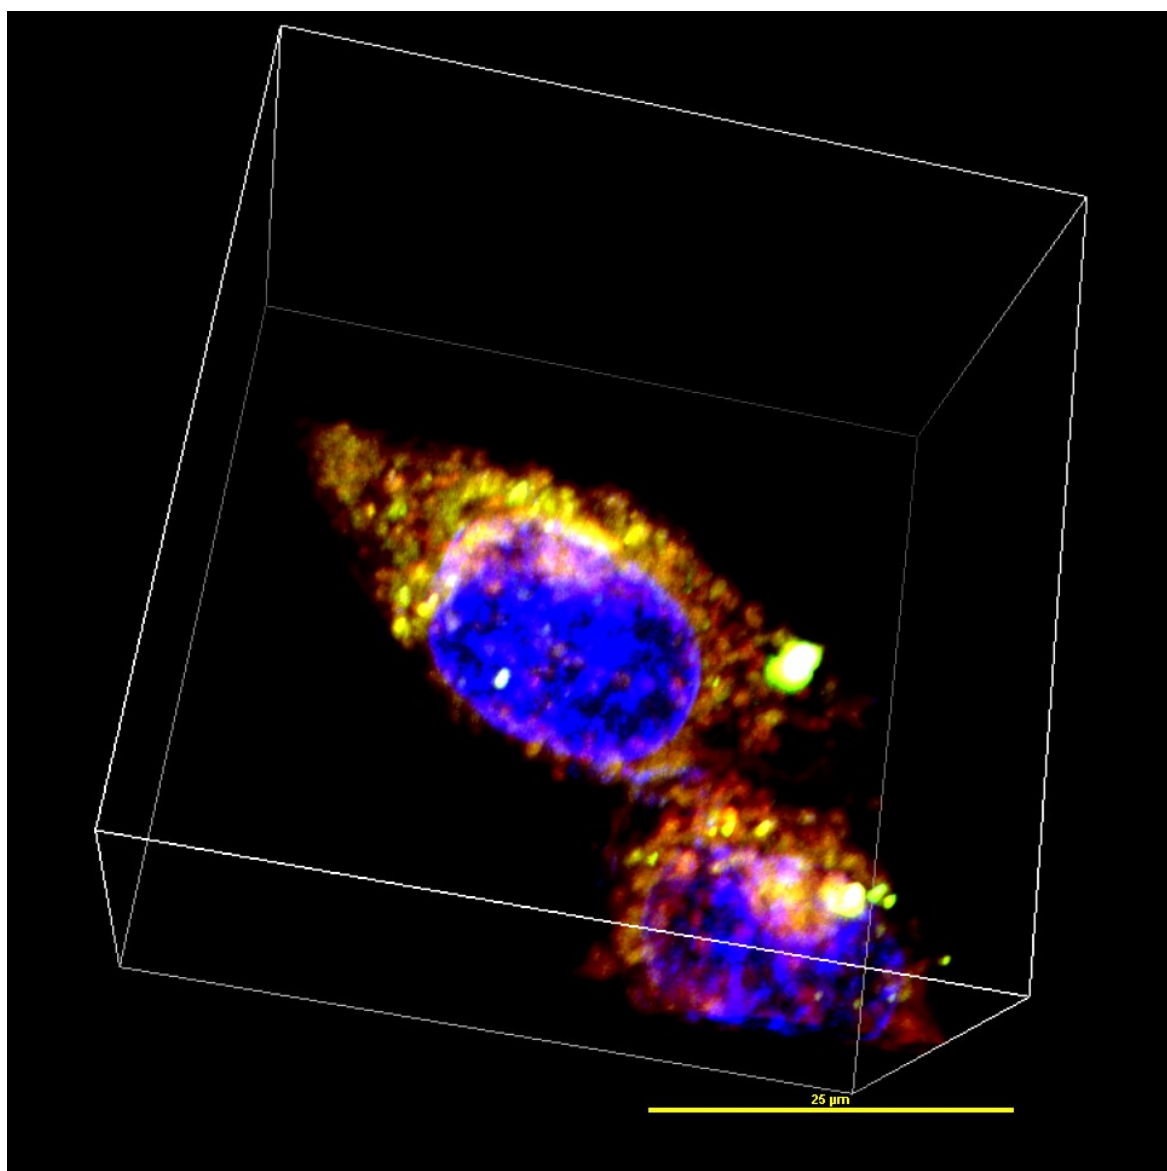

**Figure S11.** Confocal Z-stack images of CHO cell (cells were incubated with the probe **2**, DAPI, and lysotracker green): Image was rotated and optically sectioned along the Z-axis to have a better visualization of the intra cellular distribution of the probe **2**. From the images it can be clearly seen that both the probe **2** and the lysotracker green are co-localized in the lysosome.

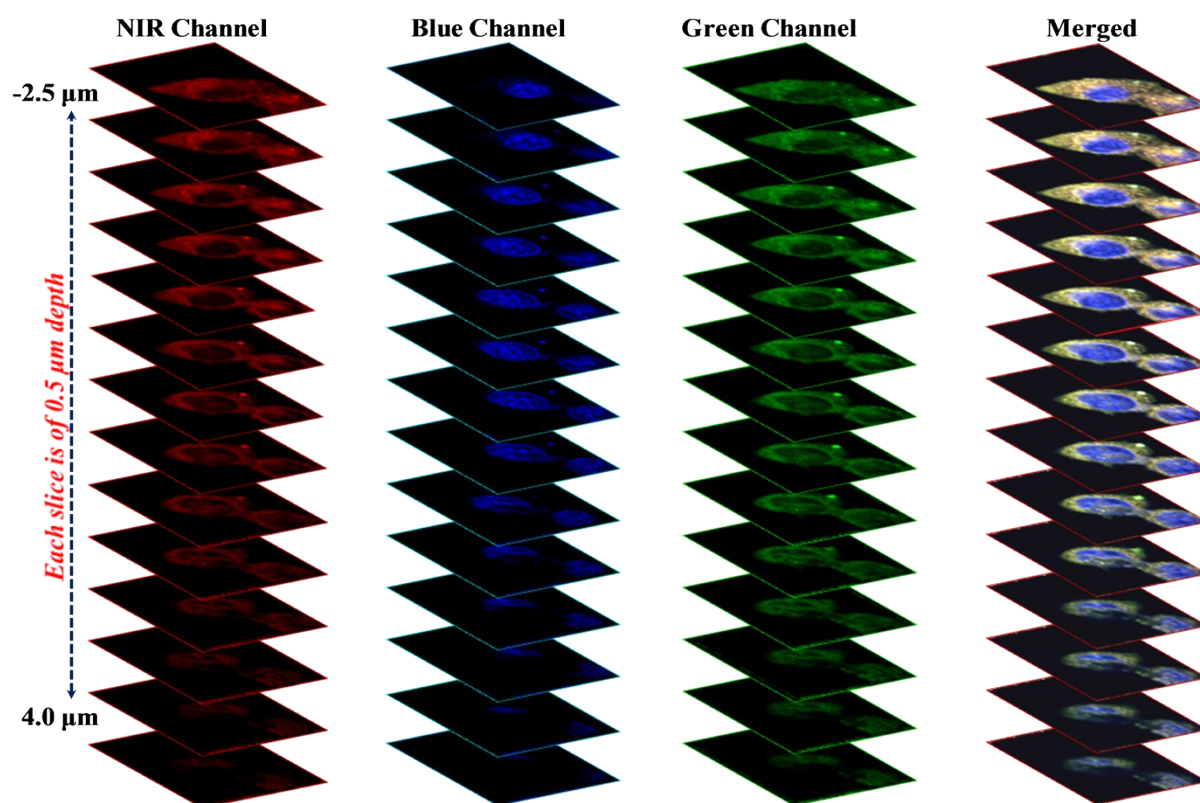

**Figure S12.** Confocal Z-stack images of CHO cell (cell lines incubated with the probe 2, DAPI, and lysotracker green): Image was rotated and optically sectioned (each section depth is 0.5μm) along the Z-axis to have a better visualization of the intra cellular distribution of the probe 2. (a) NIR, (b) blue, (c) green channel and (d) merged images.



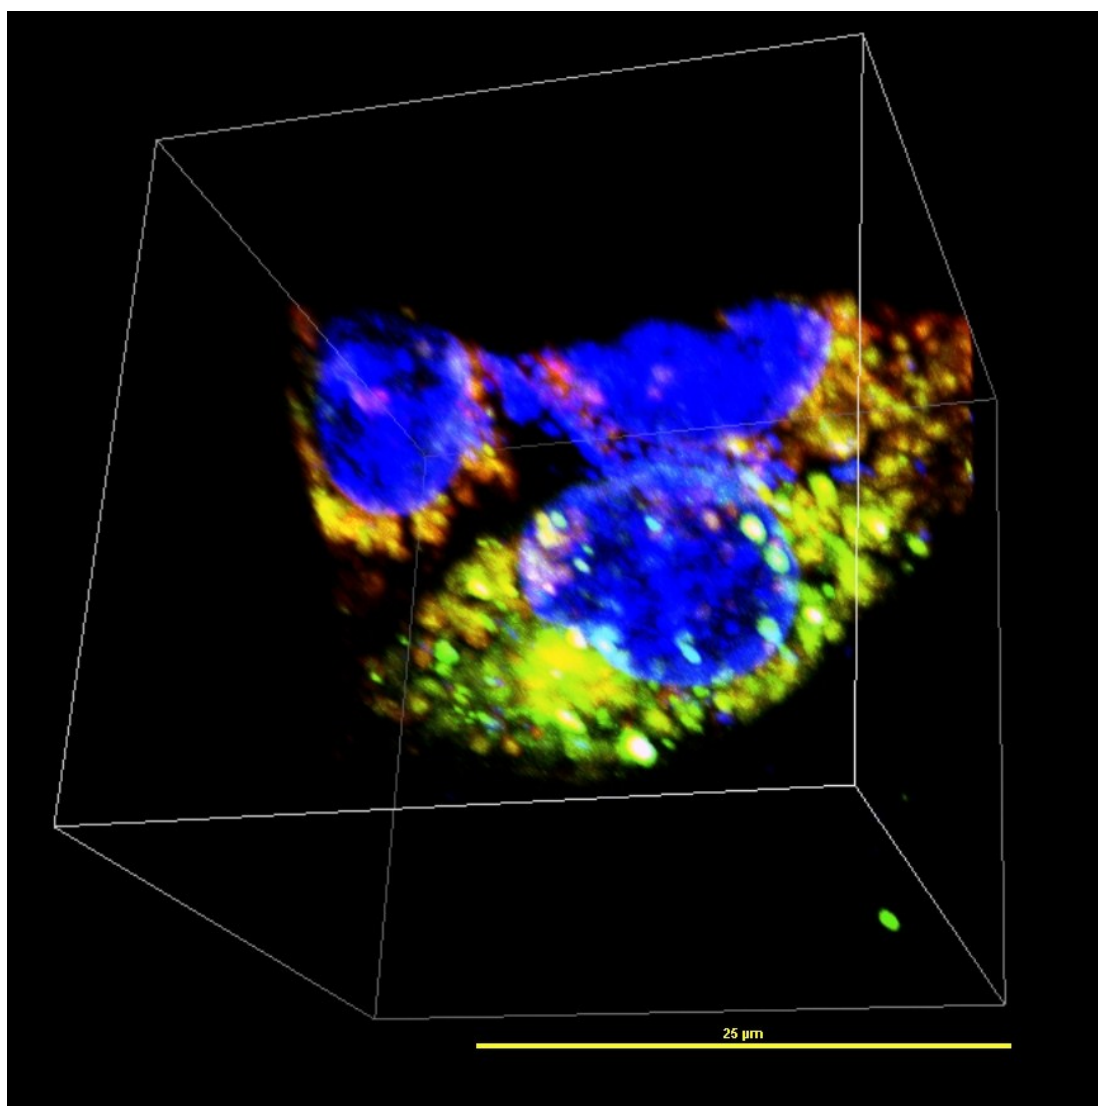

**Figure S13.** Confocal Z-stack images of CHO cell (cell lines incubated with the probe 2, DAPI, and mitotracker green): Image was rotated and optically sectioned along the Z-axis to have a better visualization of the intra cellular distribution of the probe 2. From the images it can be clearly seen that the probe 2 and the myotracker green are located separately in the cell.

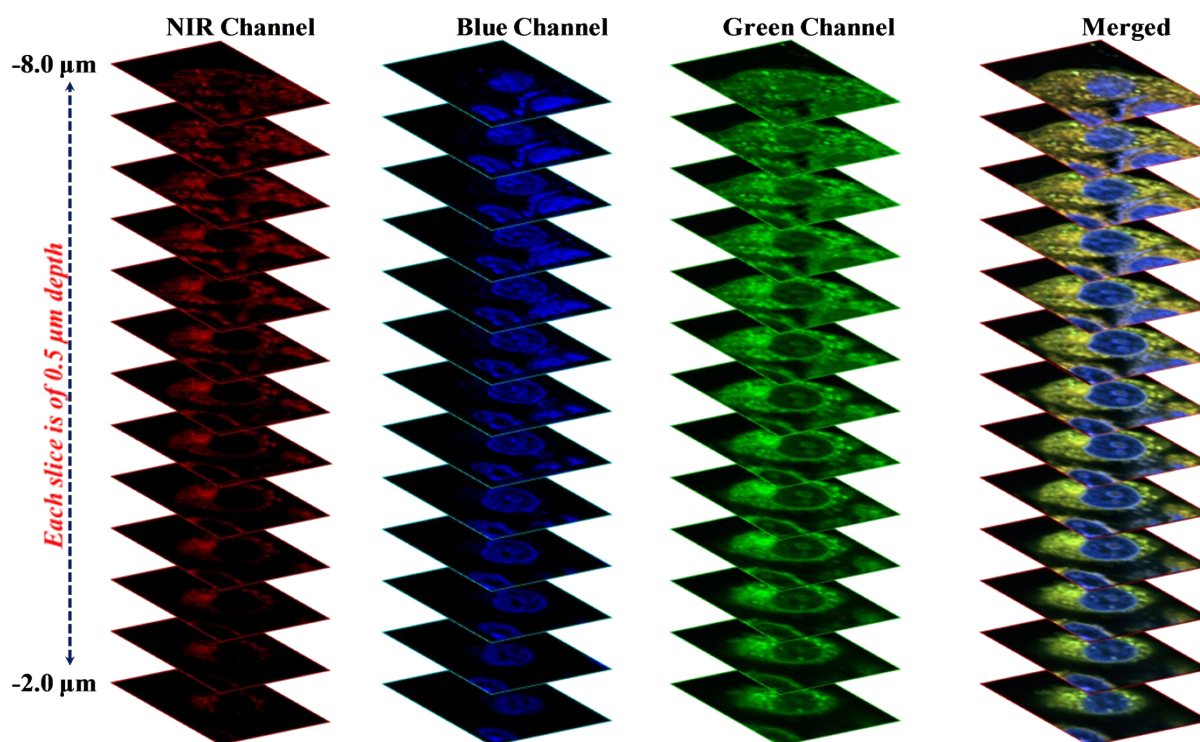

**Figure S14.** Confocal Z-stack images of CHO cell (cell lines incubated with the probe **2**, DAPI, and mitotracker green): Image was rotated and optically sectioned (each section depth is  $0.5\mu\text{m}$ ) along the Z-axis to have a better visualization of the intra cellular distribution of the probe **2**. (a) NIR, (b) blue, (c) green channel and (d) merged images.

## 9. Live Cell Imaging

MCF 7 cells ( $5 \times 10^4$ ) were grown in sterilized 35 mm cover glass-bottom (SPL life sciences co. Ltd. Korea) confocal dishes containing DMEM supplemented with 10% fetal bovine serum at 5%  $\text{CO}_2$  environment at  $37^\circ\text{C}$  to control and create the appropriate environment for imaging in healthy live cells. After confluence, cells were washed with 1x PBS ( $3 \times 1$  mL) then treated with probe **2** ( $2 \mu\text{M}$ ). After 2 h of incubation cells were washed thoroughly with PBS ( $3 \times 1$  mL) followed by 1 mL fresh culture media was added to the well and cells were observed with confocal microscope (Nikon Ti Eclipse).

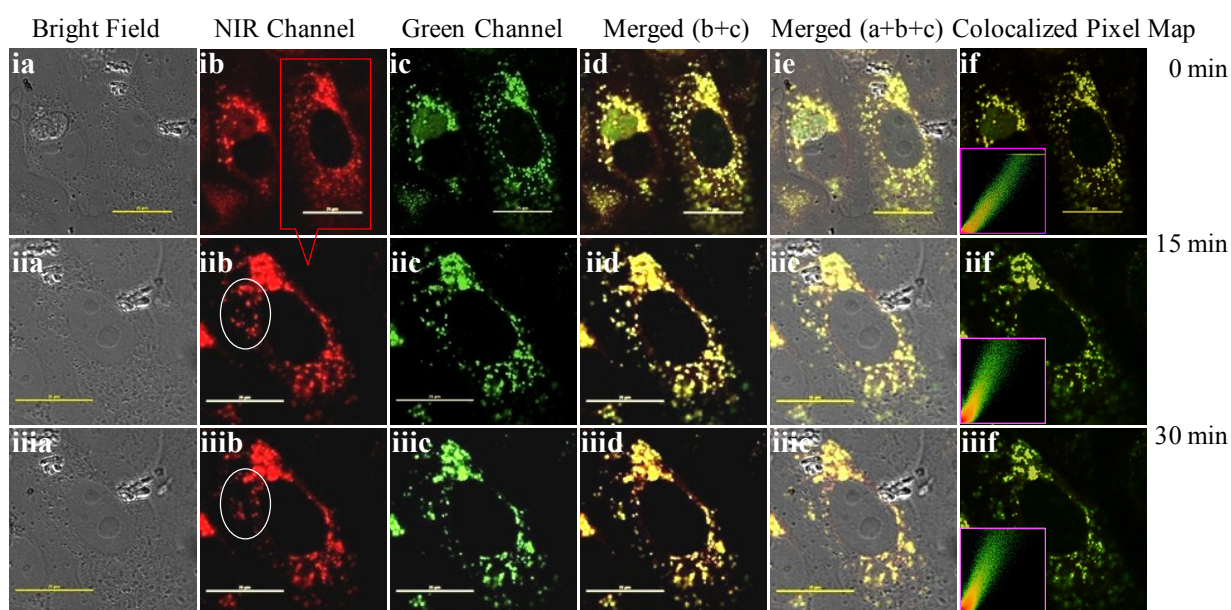

**Figure S15.** CLSM images of live MCF7 cells: cells were incubated with 2 and LTG for 4 h. Imaging was done in every 15 min starting from 0 min to 30 min. (a) bright field, (b) NIR, (c) green channel, (d) merged of NIR and green channel, (e) merged of a, b and c channel (f) colocalization pixel map of corresponding NIR and green channel. Inset of (1f-vf) is the corresponding scatter plot: concentrated pixels along the diagonals indicate high degree of colocalization of probe 2 and LTG. Scale bar 25 $\mu$ m.

## 10. Cellular Uptake study with Flow Cytometry

The degree of cellular uptake was studied quantitatively using flow cytometry. Cancerous MCF-7 and noncancerous CHO cells were cultured separately in 6 well plates at a density of  $1 \times 10^5$  cells per well for 8 h. The cells were then incubated with Probe 2 (2  $\mu$ M) for three different time intervals (0, 2 and 4 h respectively). Cells were harvested by trypsinization, washed with PBS ( $3 \times 1$  mL) and were analysed using flow cytometer (BD FACS canto II) under PE channel. The shift of the fluorescently labelled cells was compared with untreated cells using FCS software.

## 11. In vivo experiment:

Female C57BL/6J mice (6–8 week old, each weighing 20–22 g) were procured from the animal house of our Institute. All animals were maintained in filtered-top autoclavable cages provided with sterilized water, food, and bedding. All the experiments were conducted in accordance with the protocols approved by our Institutional Animal Ethics committee vide approval (IICT/IAEC/44/2018) of the Indian Institute of Chemical Technology (CSIR-IICT), Hyderabad, India.

### 11.1. In vivo bio-distribution studies of probe 2 using C57BL/6J mice models:

After successful *in vitro* studies of the probe 2 we were interested to evaluate applicability of the same for the *in vivo* deep tissue imaging in C57BL/6J mice model by the means of *in vivo* NIR imaging technique. *In vivo* imaging studies have been conducted in accordance with the guidelines from the CPCSEA, New Delhi after approval of Institutional Animal Ethics Committee (IAEC) on animal care with approved protocols. The probe 2 was



intravenously injected to rodents at intervals of 0, 8, 16 and 24 hours to a smaller group of 4-5 animals at a dose of 4mg/kg (in PBS solution) of body weight of mice. Animals were Euthanized 8, 16 and 24h after the injection, and dissected. The organs of interest (usually: liver, spleen, kidney, brain, heart and tumor, etc.) are placed in pre-weighed containers, then into an in-vivo imager device that measures NIR emission. The results give a dynamic view of how the probe **2** moves through the animal.

## 11.2. Immunohistochemistry:

4-6 weeks old C57BL/6J mice were treated with **2** at two different concentrations (4 and 16 mg/kg respectively) and in a control experiment mice were treated with Hanks' balanced salt solution (HBSS) by i.v. injection in every alternative day for a period of 4 weeks. After completion of the treatment five major organs i.e. heart, kidney, lungs, liver and spleen were harvested from the treated and controlled mice and were fixed in 10% (w/v) neutral buffered formalin and the fixed tissues were embedded in paraffin from which 4  $\mu$ m sections were prepared. Hematoxylin and eosin (H&E) staining experiment was carried out following the standard protocol. Briefly, sections were immersed in the filtered Harris Hematoxylin for 10 seconds and washed with running water followed by it was immersed in EOSIN stain for ~30 seconds and the sections were again washed with running water. Subsequently all the sections were dehydrate in ascending percentage of alcohol solutions (50%, 70%, 80%, 95% x 2 and 100% x 2) in Columbia staining dish. Finally, sections were cleared with xylene (3-4x) in Columbia staining dish and mounted on coverslip onto the section on glass slide with Permount. The images were acquired with an optical microscope.

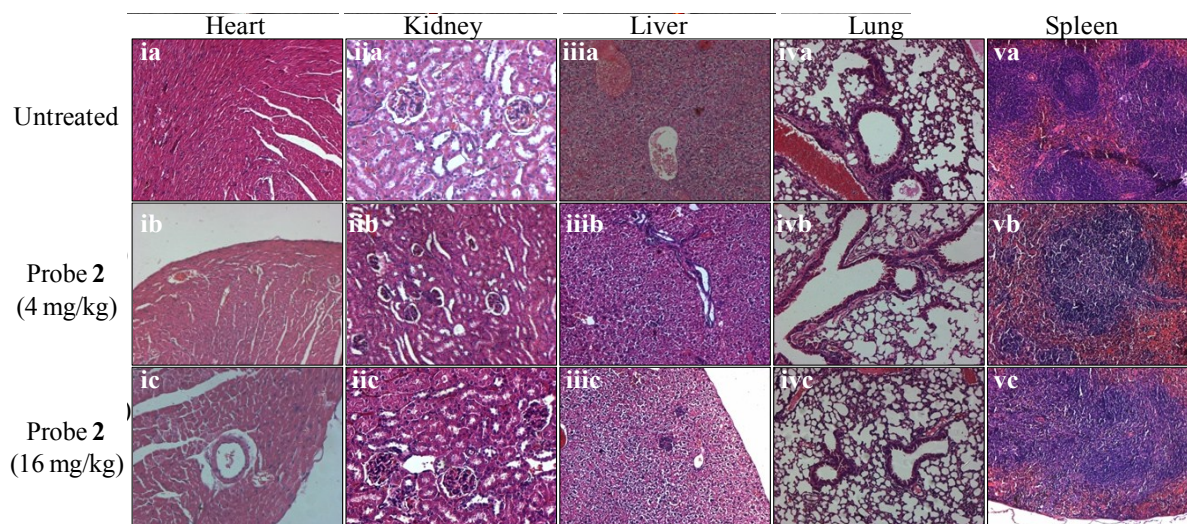

**Figure S16. i-v(a-c):** HE stained tissue sections of different organs harvested from the mice with and without treatment with the probe **2**.

## 12. pH dependent ratiometric cell imaging

### 12.1. pH dependent ratiometric cell imaging on fixed MCF 7 cells:

Cells ( $5 \times 10^4$ ) were grown in sterilized 35 mm cover glass-bottom (SPL life sciences co. Ltd. Korea) confocal dishes containing DMEM supplemented with 10% fetal bovine serum and

5% CO<sub>2</sub> environment at 37°C. After confluence cells were washed with 1x PBS (3×1 mL) and treated with probe 2. After 4 h of incubation cells were fixed with 4% paraformaldehyde and washed thoroughly with PBS (3×1 mL) then 1 mL fresh media of pH 7.4 was added to the well and cells were imaged with confocal microscope (Nikon Ti Eclipse). Afterwards media was discarded and washed with PBS followed by fresh culture media of pH 4.5 was added and kept for 20 min followed by images were taken with confocal microscope keeping all the microscopic parameter the same.

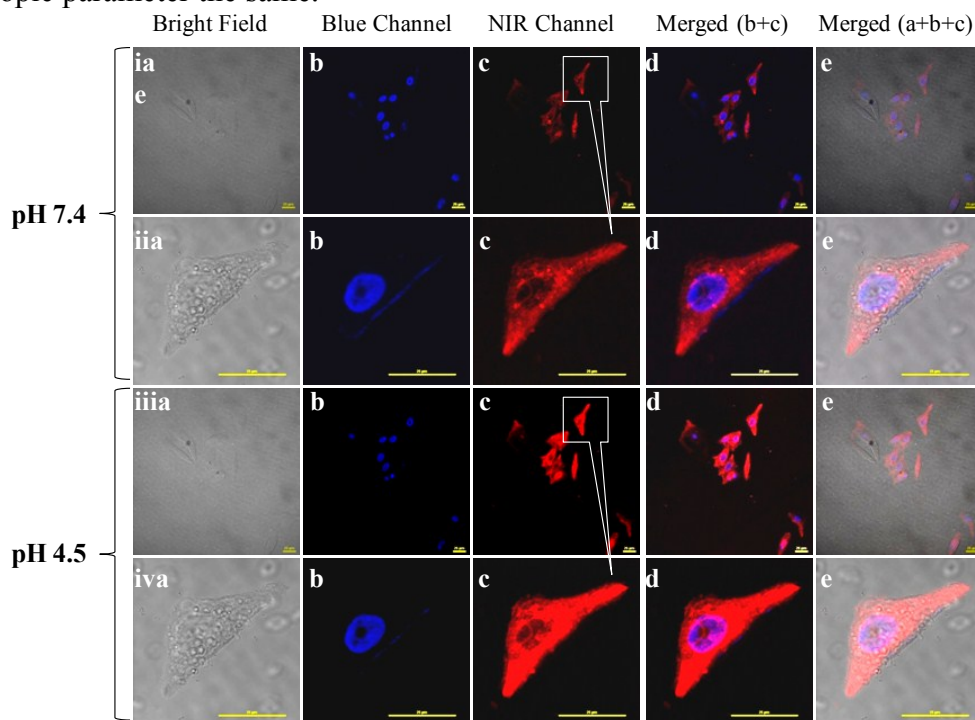

**Figure S17.** CLSM images of MCF-7 cells incubated with 2: (ia-e and iia-e) at pH 7.4. (iiaa-e and iv a-e) The same cell imaged after media changed to pH 4.5, keeping all the microscopic parameter the same. Scale bar 25µm.

### 12.2. pH dependent ratiometric cell imaging on live MCF 7 cells:

MCF-7 cells ( $5 \times 10^4$ ) were grown in sterilized 35 mm cover glass-bottom (SPL life sciences co. Ltd. Korea) confocal dishes containing DMEM supplemented with 10% fetal bovine serum and 5% CO<sub>2</sub> environment at 37°C to create the appropriate environment for imaging in healthy live cells. After confluence cells were washed with 1x PBS (3×1 mL) and treated with probe 2. After 4 h of incubation cells were washed thoroughly with PBS (3×1 mL) 1 mL fresh media of pH 7.4 was added to the well and cells were imaged with confocal microscope (Nikon Ti Eclipse). Afterwards media was discarded and washed with PBS followed by fresh culture media of pH 4.5 was added and waited for 20 min followed by image was taken with confocal microscope keeping all the microscopic parameter the same.

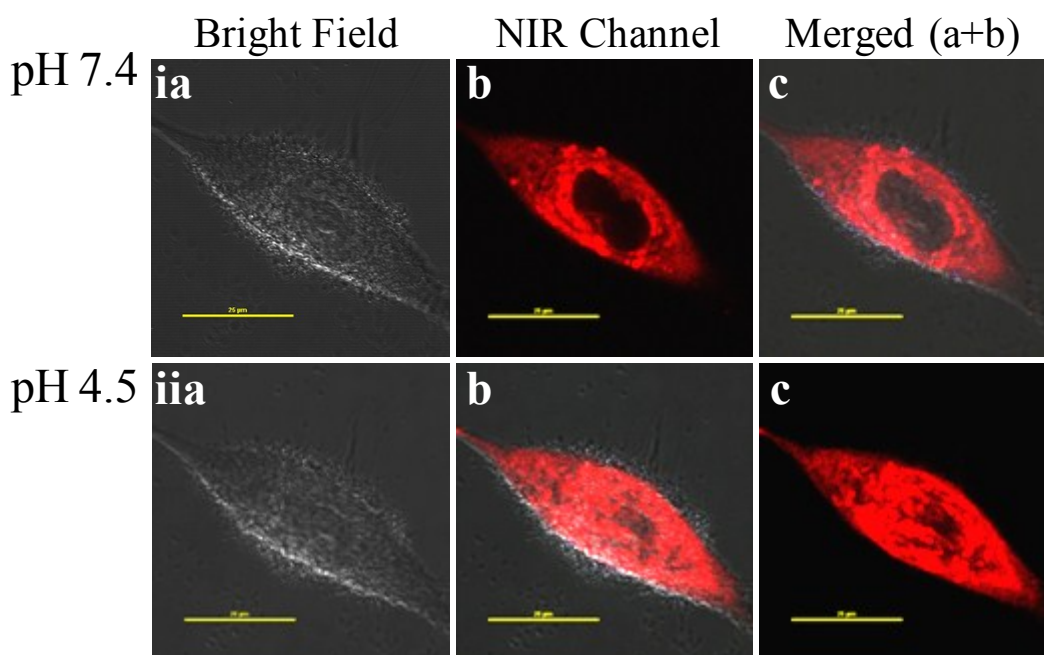

**Figure S18.** CLSM images of live MCF-7 cells incubated with **2**: (ia-c) at pH 7.4. (iaa-c) The same cells imaged after media changed to pH 4.5, keeping all the microscopic parameter the same. Scale bar 25 $\mu$ m.

### 13. Photostability of probe **2**:

MCF-7 cells were incubated with the probe **2** and the lysotracker green for 4 h followed by media was discarded and cells were fixed with paraformaldehyde (4%) and washed two times with PBS. Cell nucleus was stained with DAPI. CLSM images was taken continuously for 8 min keeping the laser on which revealed fast photo-bleaching of lysotracker green compared to the probe **2** (**Figure S11**). Therefore, the probe **2** can be an ideal candidate for the longer acquisition of bioanalytical and biomedical imaging.



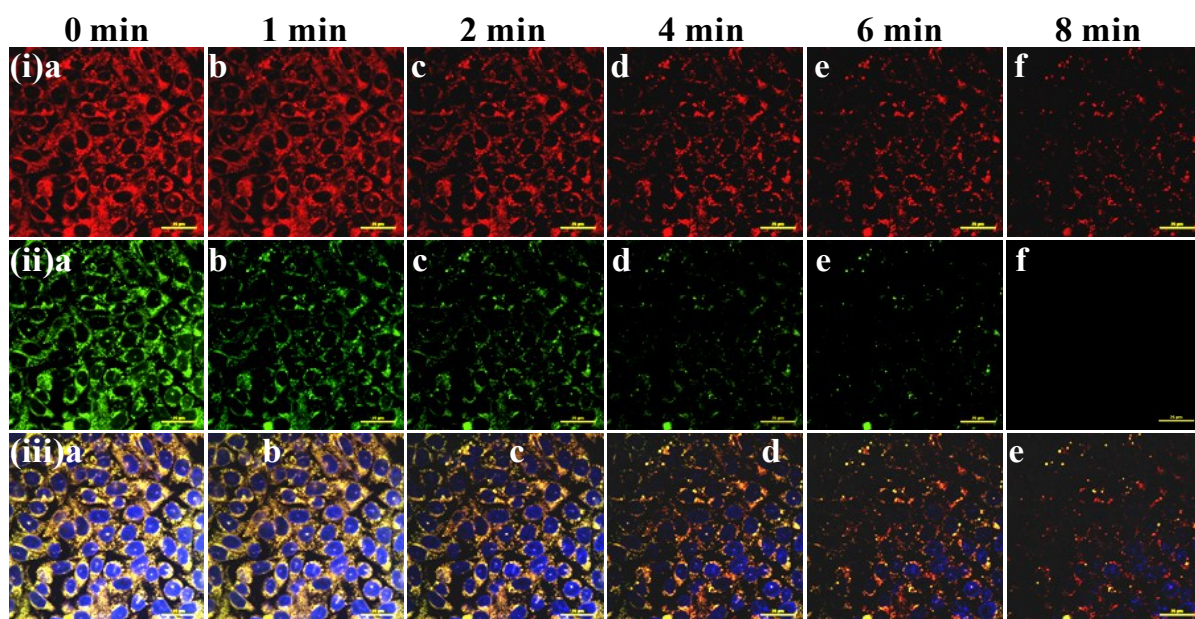

**Figure S19.** CLSM images of fixed MCF-7 cells incubated with 2 and lysotracker green: (i) NIR emission from the probe 2, (ii) emission from the lysotracker green and (iii) merged images of (i) and (ii). Scale bar 25  $\mu$ m.

#### 14. Particle size analysis:

Since the probe **2** is hydrophobic in nature so in aqueous media it forms nanoparticles. We performed dynamic light scattering (DLS) analysis to determine the particle size. The hydrodynamic diameter of freshly prepared nanoparticles **2** at pH 7.4 was of 184 nm (**Fig S20, S21**). We also have measured the zeta potential of freshly prepared nanoparticles **2** which was -2.8 mV (**Fig S22, S23**).

Whereas, the hydrodynamic diameter of nanoparticles of **2** at pH 5 was found to be 58 nm (**Fig S24, S25**) which clearly supports our hypothesis of protonation of morpholine N atom and thereby dissolution of the aggregates.

New Size Template

Created by: acer  
Created at: 24-Sep-19 11:56:41 AM



---

**General**

|                  |                        |                 |  |
|------------------|------------------------|-----------------|--|
| Measurement name | MOR ONP SIZE in pH 7.4 | User            |  |
| Method           |                        | Time            |  |
| Status           | Succeeded              | Instrument type |  |
| Measurement type | Particle size          |                 |  |

---

**Settings**

|                    |              |                    |            |
|--------------------|--------------|--------------------|------------|
| Measurement cell   | Disposable   | Equilibration time | 0h 01m 00s |
| Angle              | Back scatter | Analysis model     | General    |
| Target temperature | 25.0 °C      | Cumulant model     | Advanced   |

---

**Material**

|                    |              |                          |        |
|--------------------|--------------|--------------------------|--------|
| Name               | New material | Refractive index Laser 1 | 1.0000 |
| Absorption Laser 1 | 0.0000       |                          |        |

---

**Solvent**

|           |              |                  |        |
|-----------|--------------|------------------|--------|
| Name      | PBS tablet   | Refractive index | 1.3300 |
| Viscosity | 0.8882 mPa.s |                  |        |

---

**Data output**

|                           |                      |                      |                 |
|---------------------------|----------------------|----------------------|-----------------|
| Hydrodynamic diameter     | 184.09 nm            | Polydispersity index | 15.9 %          |
| Intercept g1 <sup>2</sup> | 0.6826               | Mean intensity       | 289.2 kcounts/s |
| Filter optical density    | 1.8500               | Baseline             | 0.998           |
| Focus position            | -3.7 mm              | Angle used           | Back scatter    |
| Processed runs            | 10                   | Transmittance        | 97.3 %          |
| Diffusion Coefficient     | - μm <sup>2</sup> /s |                      |                 |

Figure S20: Hydrodynamic diameter of freshly prepared nanoparticles **2** at pH 7.4.



**Particle size distribution by intensity**

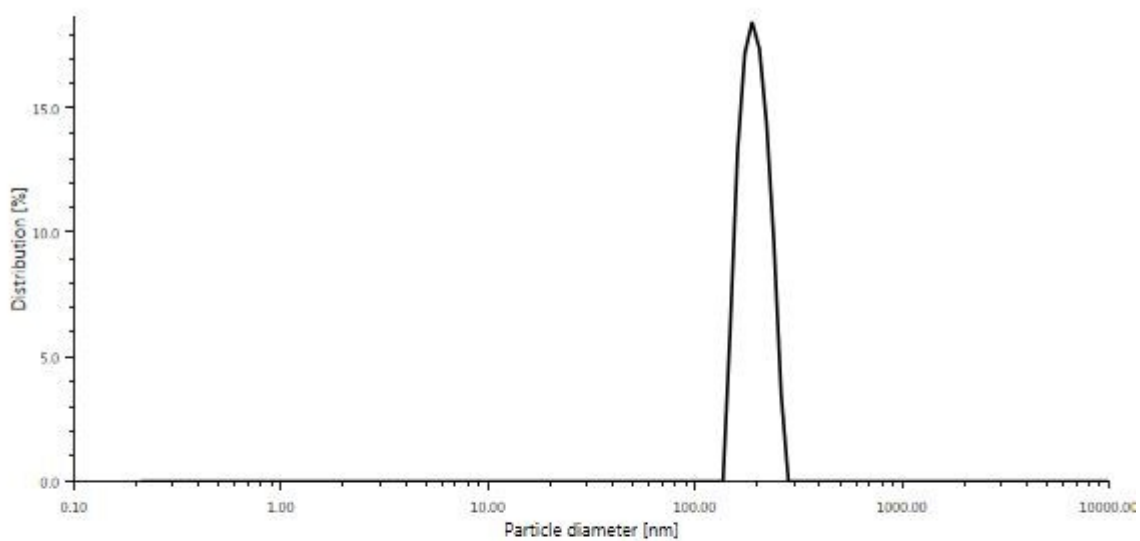

**Particle size distribution by number**

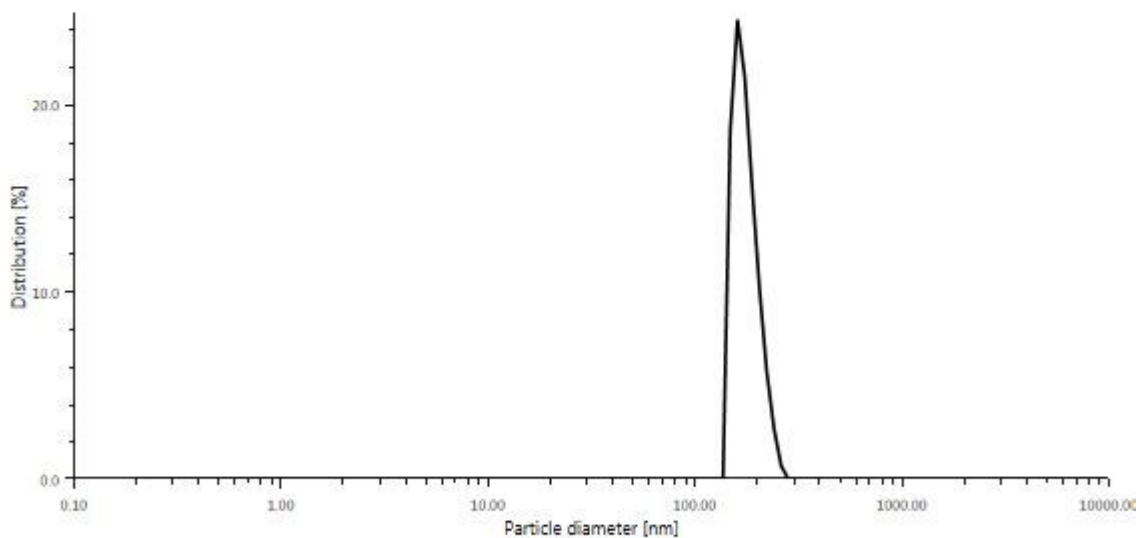

**Particle size distribution peaks**

| Weighting model | Peak 1 [nm] | Peak 2 [nm] | Peak 3 [nm] |
|-----------------|-------------|-------------|-------------|
| Intensity       | 195.05      | -           | -           |
| Volume          | 187.75      | -           | -           |
| Number          | 176.56      | -           | -           |

**Figure S21:** Particle size distribution of freshly prepared nanoparticles 2 at pH 7.4.

---

**General**

|                         |                        |                        |  |
|-------------------------|------------------------|------------------------|--|
| <b>Measurement name</b> | MOR ORG NP Zeta pH 7.4 | <b>User</b>            |  |
| <b>Method</b>           |                        | <b>Time</b>            |  |
| <b>Status</b>           | Succeeded              | <b>Instrument type</b> |  |
| <b>Measurement type</b> | Zeta potential         |                        |  |

---

**Settings**

|                         |               |                           |            |
|-------------------------|---------------|---------------------------|------------|
| <b>Measurement cell</b> | Omega Cuvette | <b>Equilibration time</b> | 0h 01m 00s |
| <b>Approximation</b>    | Smoluchowski  | <b>Target temperature</b> | 25.0 °C    |
| <b>Adjustment mode</b>  | Automatic     | <b>Voltage</b>            | 200.0 V    |
| <b>Debye factor</b>     | 1.5           |                           |            |

---

**Quality**

|                 |        |                       |     |
|-----------------|--------|-----------------------|-----|
| <b>Run mode</b> | Manual | <b>Number of runs</b> | 100 |
|-----------------|--------|-----------------------|-----|

---

**Solvent**

|                  |              |                              |        |
|------------------|--------------|------------------------------|--------|
| <b>Name</b>      | Water        | <b>Refractive index</b>      | 1.3303 |
| <b>Viscosity</b> | 0.8903 mPa.s | <b>Relative permittivity</b> | 78.37  |

---

**Data output**

|                                |                 |                                 |                                            |
|--------------------------------|-----------------|---------------------------------|--------------------------------------------|
| <b>Mean zeta potential</b>     | 0.0 mV          | <b>Electrophoretic mobility</b> | -0.0011 $\mu\text{m}^2\text{cm}/\text{Vs}$ |
| <b>Distribution peak value</b> | -2.8 mV         | <b>Filter optical density</b>   | 2.1639                                     |
| <b>Processed runs</b>          | 100             | <b>Conductivity</b>             | 0.001 mS/cm                                |
| <b>Adjusted voltage</b>        | 200.0 V         | <b>+/- Standard deviation</b>   | 0.2 mV                                     |
| <b>Mean intensity</b>          | 692.2 kcounts/s | <b>Transmittance</b>            | 86.5 %                                     |

Figure S22: Zeta potential of freshly prepared nanoparticles 2 at pH 7.4.

**Zeta potential distribution**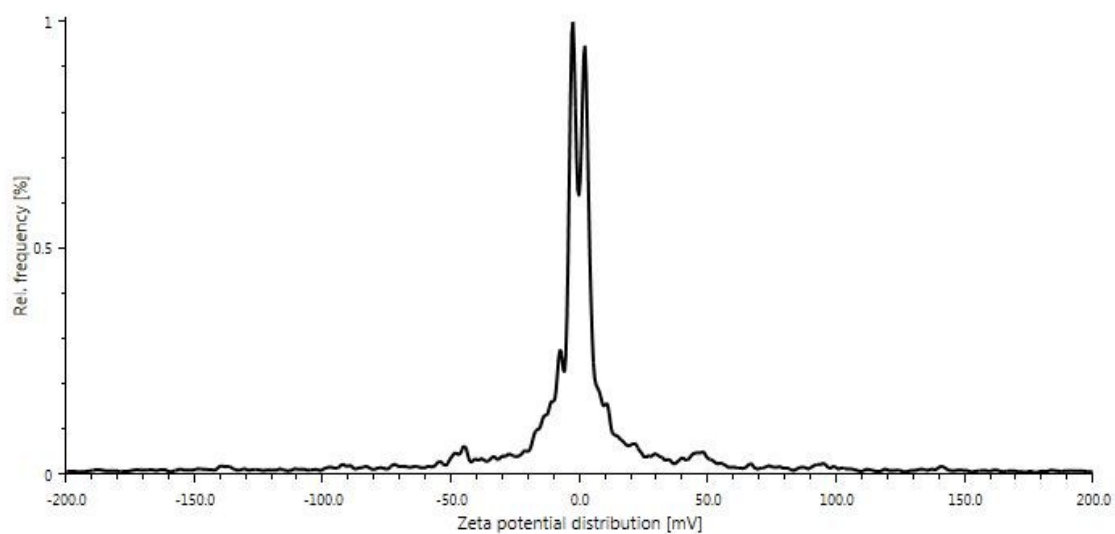**Instrument information**

|               |          |                  |        |
|---------------|----------|------------------|--------|
| Serial number | 81962693 | Laser wavelength | 660 nm |
|---------------|----------|------------------|--------|

**Comment**

Figure S23: Zeta potential distribution of freshly prepared nanoparticles 2 at pH 7.4.

Created by: acer

Created at: 24-Sep-19 12:06:16 PM

**General**

|                         |                 |                        |  |
|-------------------------|-----------------|------------------------|--|
| <b>Measurement name</b> | 30 min MOR pH 5 | <b>User</b>            |  |
| <b>Method</b>           |                 | <b>Time</b>            |  |
| <b>Status</b>           | Succeeded       | <b>Instrument type</b> |  |
| <b>Measurement type</b> | Particle size   |                        |  |

**Settings**

|                           |            |                           |            |
|---------------------------|------------|---------------------------|------------|
| <b>Measurement cell</b>   | Disposable | <b>Equilibration time</b> | 0h 01m 00s |
| <b>Angle</b>              | Automatic  | <b>Analysis model</b>     | General    |
| <b>Target temperature</b> | 25.0 °C    | <b>Cumulant model</b>     | Advanced   |

**Material**

|                           |              |                                 |        |
|---------------------------|--------------|---------------------------------|--------|
| <b>Name</b>               | New material | <b>Refractive index Laser 1</b> | 1.0000 |
| <b>Absorption Laser 1</b> | 0.0000       |                                 |        |

**Solvent**

|                  |              |                         |        |
|------------------|--------------|-------------------------|--------|
| <b>Name</b>      | Water        | <b>Refractive index</b> | 1.3303 |
| <b>Viscosity</b> | 0.8903 mPa.s |                         |        |

**Data output**

|                                |                        |                             |               |
|--------------------------------|------------------------|-----------------------------|---------------|
| <b>Hydrodynamic diameter</b>   | 58.01 nm               | <b>Polydispersity index</b> | 121.5 %       |
| <b>Intercept g<sup>1</sup></b> | 782.6758               | <b>Mean intensity</b>       | 0.2 kcounts/s |
| <b>Filter optical density</b>  | 0.0000                 | <b>Baseline</b>             | 1.000         |
| <b>Focus position</b>          | 0.6 mm                 | <b>Angle used</b>           | Side scatter  |
| <b>Processed runs</b>          | 10                     | <b>Transmittance</b>        | 101.2 %       |
| <b>Diffusion Coefficient</b>   | 8.5 μm <sup>2</sup> /s |                             |               |

Figure S24: Hydrodynamic diameter of the nanoparticles of 2 at pH 5.

**Particle size distribution by intensity**

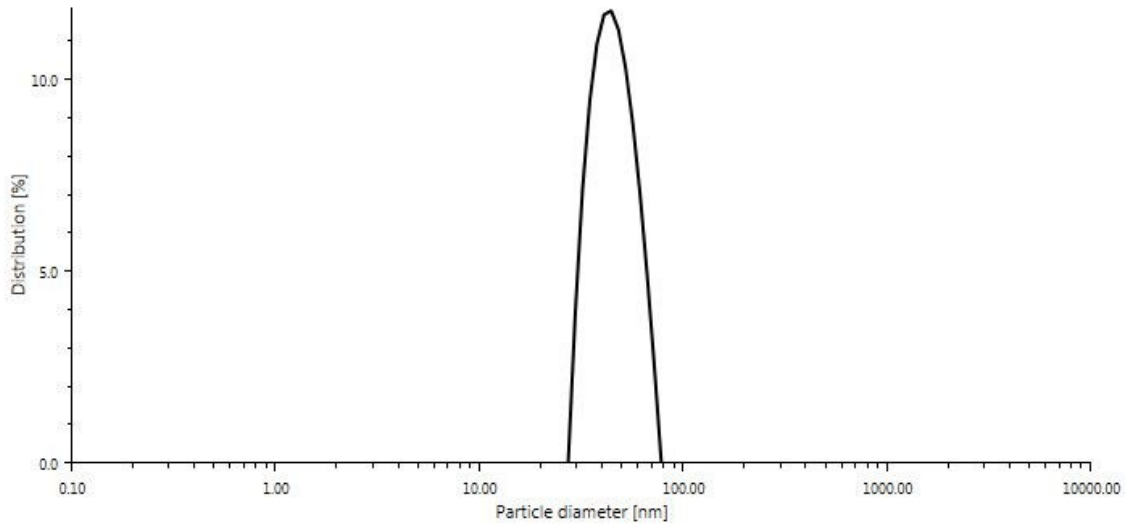

**Particle size distribution by number**

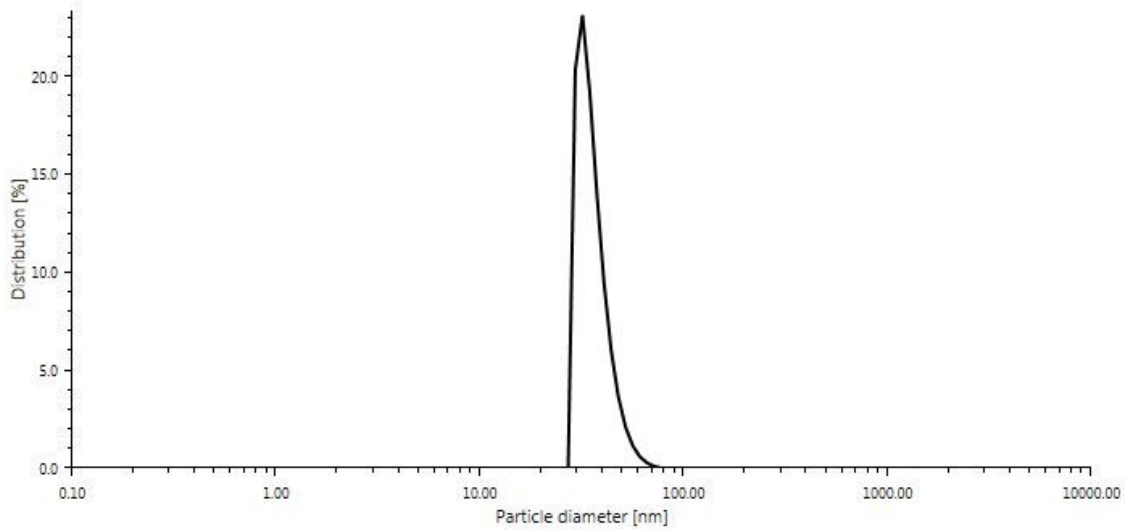

**Figure S25:** Particle size distribution of the nanoparticles of 2 at pH 5.

Created by: acer

Created at: 24-Sep-19 12:13:52 PM

---

**General**

|                         |                |                        |  |
|-------------------------|----------------|------------------------|--|
| <b>Measurement name</b> | Zeta mor ph-5  | <b>User</b>            |  |
| <b>Method</b>           |                | <b>Time</b>            |  |
| <b>Status</b>           | Succeeded      | <b>Instrument type</b> |  |
| <b>Measurement type</b> | Zeta potential |                        |  |

---

**Settings**

|                         |               |                           |            |
|-------------------------|---------------|---------------------------|------------|
| <b>Measurement cell</b> | Omega Cuvette | <b>Equilibration time</b> | 0h 01m 00s |
| <b>Approximation</b>    | Smoluchowski  | <b>Target temperature</b> | 25.0 °C    |
| <b>Adjustment mode</b>  | Automatic     | <b>Voltage</b>            | 200.0 V    |
| <b>Debye factor</b>     | 1.5           |                           |            |

---

**Quality**

|                 |        |                       |     |
|-----------------|--------|-----------------------|-----|
| <b>Run mode</b> | Manual | <b>Number of runs</b> | 100 |
|-----------------|--------|-----------------------|-----|

---

**Solvent**

|                  |              |                              |        |
|------------------|--------------|------------------------------|--------|
| <b>Name</b>      | Water        | <b>Refractive index</b>      | 1.3303 |
| <b>Viscosity</b> | 0.8903 mPa.s | <b>Relative permittivity</b> | 78.37  |

---

**Data output**

|                                |                 |                                 |                                     |
|--------------------------------|-----------------|---------------------------------|-------------------------------------|
| <b>Mean zeta potential</b>     | 0.0 mV          | <b>Electrophoretic mobility</b> | -0.0012 $\mu\text{m}^2\text{cm/Vs}$ |
| <b>Distribution peak value</b> | -2.2 mV         | <b>Filter optical density</b>   | 2.7151                              |
| <b>Processed runs</b>          | 100             | <b>Conductivity</b>             | 22.191 mS/cm                        |
| <b>Adjusted voltage</b>        | 48.7 V          | <b>+/- Standard deviation</b>   | 0.3 mV                              |
| <b>Mean intensity</b>          | 692.2 kcounts/s | <b>Transmittance</b>            | 1.4 %                               |

Figure S26: Zeta potential of nanoparticles 2 at pH 5.

**Zeta potential distribution**

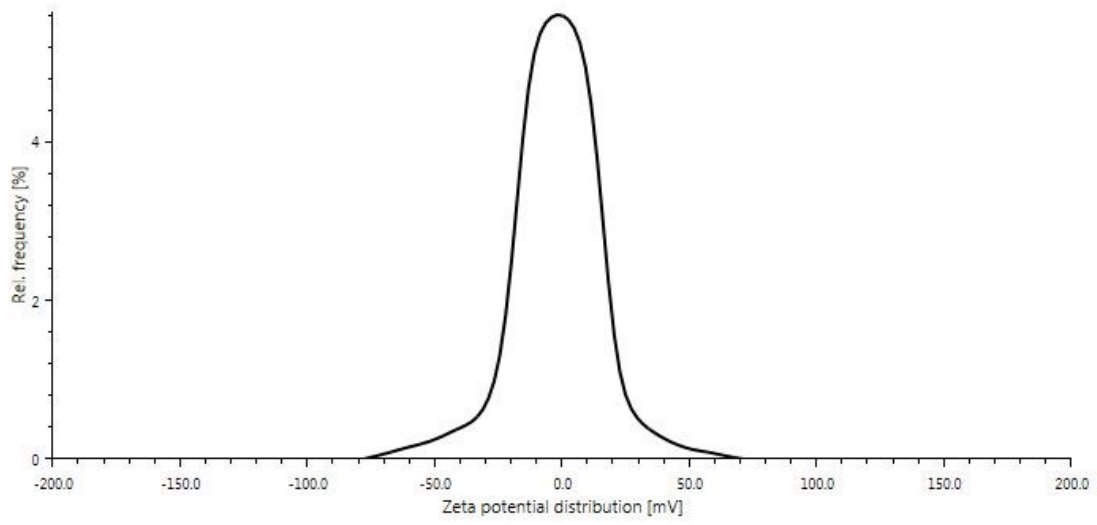

**Instrument information**

|                      |          |                         |        |
|----------------------|----------|-------------------------|--------|
| <b>Serial number</b> | 81962693 | <b>Laser wavelength</b> | 660 nm |
|----------------------|----------|-------------------------|--------|

**Comment**

Figure S27: Zeta potential distribution of nanoparticles 2 at pH 5.
